# Supplementary material for: The contribution of estimated dead space fraction to mortality prediction in patients with chronic obstructive pulmonary disease—a new proposal
Source: PeerJ. 2024 Mar 27;12:e17081. doi: 10.7717/peerj.17081 (PMC10981412; doi:10.7717/peerj.17081)
Supplement: Supplemental Information 1 [file peerj-12-17081-s001.xlsx]

## Sheet: raw_data
group	chart_no	name	sex, female=0; male=1	birth	age2021	age_in	inhosp_death	death_mohw	death_period	enroll_d	Censor date	cause	ad_n	last_ad_d	last_v_d	height	weight	SMK	Ulung	walk6min	f_u time	verylowFEV1	death_cause_mohw	death_cause_hosp	death_cause_mohw_s	death_cause_FEV1_1	ad_n_copd	BDdrug1	CCI	VDVtrest_esti	VDVtpk_esti	FEV1FVCpre	FEV1FVCpost	FVCPre	FEV1Pre	MMEF7525Pre	PEFPre	ICforcedPre	FVCPost	FEV1Post	MMEF7525Post	PEFPost	FVCPostChg	FEV1PostChg	FEV1FVCPostChg	MMEF7525PostChg	PEFPostChg	TLCPre	RVPre
1			0		66	60.2685			0	2016-03-03	2017-07-31		0		2017-07-18	161	57	NA	0	0	515						0	5	5	0.589397	0.406654	66.71	74.64	95	75	33	84	90	96	85	47	101	1	13	12	43	20	94	106
1			1		88	81.337		20170714	1	2014-05-07	2017-07-14	18	9	2017-07-13 14:09:01	2017-07-13 14:09:01	169	45	40	1	0	1164		1		Pneumonia, COPD AE		8	6	6	0.631224	0.432837	64.3	69.9	83	72	61	71	95	92	87	56	63	11	21	9	-9	-12	99	130
1			1		76	70.9479			0	2016-10-21	2017-07-31		2	2015-06-22 13:53:08	2017-07-24	162	59	40	0	0	283						0	4	6	0.622627	0.388373	69.55		93	83	46	72	99										96	109
1			1		93	86.0575		20170903	2	2014-06-16	2017-07-31	26	3	2015-12-07 02:09:00	2017-06-28	161	72	55	0	0	1141		2				0	4	7	0.668505	0.420672	65.49	71.65	86	79	39	67	59	86	86	40	84	0	10	9	2	25	98	120
1			1		79	72.6877			0	2015-01-20	2017-07-31		1	2015-01-16 12:59:06	2017-07-19	156	73.2	NA	0	0	923						1	4	5	0.661586	0.440796	53.39	51.72	72	50	17	43	85	77	52	15	29	7	3	-3	-13	-32	103	148
1			1		74	69.0274			0	2016-04-12	2017-07-31		1	2017-07-27 13:26:23	2017-07-27 13:26:23	164	68	1PPD	0	0	475						0	4	5	0.609868	0.369912	63.4	61.3	85	69	25	53	90	92	73	31	56	8	5	-3	24	6	97	113
1			1		80	72.2411			0	2014-01-27	2017-07-31		2	2014-02-02 10:08:19	2017-07-13	155	57	0	0	0	1281						0	1	6	0.655734	0.449581	69.59	72	69	63	31	63	52	72	67	33	78	4	8	3	7	25	79	96
1			1		94	88.8575			0	2016-08-15	2017-07-31		0		2017-07-17	150	62	0	0	0	350						0	4	5	0.747108	0.385168	74.65	74.33	96	102	59	67	98	95	101	58	61	-1	-1		-2	-9	75	65
1			1		67	60.9315			0	2015-11-03	2017-07-31		0		2016-05-17	164	72	>35	0	0	636						0	4	3	0.574627	0.35278	71.45	72.14	102	91	54	84	109	103	93	56	80	1	2	1	4	-5	103	116
1			1		72	64.5973			0	2014-05-12	2017-07-31		3	2015-12-14 13:41:51	2017-07-27	164	70	Y	0	0	1176						0	0	3	0.583002	0.373864	74.35	74.97	92	87	52	103	92	94	89	55	103	2	2	1	6	0	96	110
1			1		73	68.6082			0	2017-02-23	2017-07-31		4	2017-07-12 15:05:37	2017-07-31	170	83	30	0	0	158						1	4	6	0.555328	0.526183	51.07	48.71	47	31	14	22	46	56	35	15	25	20	14	-5	6	13	118	238
1			1		73	67.2247		20170219	1	2015-09-22	2017-02-19	36	8	2016-06-20 10:21:56	2017-01-05	158	78		0	0	516		2				1	1	9	0.62949	0.505102	53.68	52.83	51	35	12	31	61	48	33	11	29	-5	-7	-2	-12	-5	97	167
1			1		81	74.4575			0	2014-06-16	2017-07-31		0		2017-02-16	156	50		0	0	1141						0	4	4	0.656554	0.367124	69.65	65.75	103	94	46	87	107	105	90	39	76	2	-4	-6	-14	-13	102	111
1			1		74	68.7342		20200722	2	2016-02-26	2017-07-31	11	1	2016-05-17 13:44:36	2017-07-17	163	64		1	0	521		2				1	4	7	0.623238	0.441752	55	54.67	71	50	19	37	66	71	50	20	36	0	-1	-1	8	-3	87	119
1			1		76	70.2192			0	2016-01-28	2017-07-31		9	2017-07-18 10:19:47	2017-07-29	166	70		0	0	550						1	0	8	0.603728	0.476617	70.67	68.95	62	57	34	48	77	61	55	28	49	-1	-3	-2	-18	1	85	126
1			1		89	84.1342	2020-03-18	20200318	2	2015-06-08	2017-07-31	18	2	2015-11-21 14:56:34	2017-06-13	170	53		0	0	784	in-patient	1		Pneumonia, COPD AE		1	4	6	0.629643	0.601838	37.33	33.46	46	24	12	12	54	51	23	11	15	9	-2	-10	-7	24	122	225
1			1		64	59.6384			0	2016-10-03	2017-07-31		0		2017-07-10	160	60		0	0	301						0	6	2	0.579259	0.528143	41.71	41.19	65	34	13	23	69	70	36	13	35	8	6	-1	6	54	129	240
1			1		84	81.063	2018-05-20	20180520	2	2015-10-19	2017-07-31	12	3	2016-02-09 11:10:02	2016-03-08	163	66		0	0	651		2				1	1	8	0.652694	0.520299	55.2	54.93	60	45	19	25	74	61	46	17	28	3	2	0	-10	15	105	166
1			1		81	75.4466			0	2015-06-08	2017-07-31		1	2015-06-06 12:34:16	2017-07-13	169	74	4+	0	0	784						0	4	4	0.624231	0.417799	58.43	56.07	76	59	26	38	81	73	54	24	29	-5	-9	-4	-10	-26	86	110
1			0		62	56.1123			0	2015-11-25	2017-07-31		0		2016-11-22	160	62	Y	0	0	614						0	0	2	0.568923	0.399901	76.63	73.42	79	71	38	97	77	85	73	36	97	7	3	-4	-5	0	87	106
1			0		70	64.5397			0	2016-06-08	2017-07-31		0		2017-02-17	155	57	Y	0	0	418						0	4	3	0.653395	0.462482	55.09	55.74	65	43	16	30	61	60	40	14	28	-8	-6	1	-18	-7	72	93
1			1		83	76.5808			0	2015-03-24	2017-07-31		11	2016-11-13 10:17:29	2017-07-27	168	81.5		0	0	860						0	6	6	0.619167	0.355371	69.76	69.63	95	88	48	83	92	96	88	48	72	1	1	0	1	-13	90	95
1			1		68	63.2959		20200630	2	2016-09-09	2017-07-31	36	0		2017-07-26 19:45:57	157	58		0	0	325		2				1	6	3	0.585101	0.535667	35.96	34.88	72	33	11	34	63	76	34	12	38	6	2	-3	9	12	155	284
1			1		66	60.3644		20191212	2	2015-12-28	2017-07-31	18	7	2017-05-09 14:00:24	2017-05-17	155	51		0	0	581		1		Pneumonia, COPD AE		7	6	3	0.624701	0.485977	63.63	64.62	59	47	19	36	62	61	49	20	37	3	4	2	5	4	78	111
1			0		60	56.0685			0	2017-05-19	2017-07-31		1	2017-05-18 12:40:16	2017-07-12	156	71	20	0	0	73						1	4	3	0.563886	0.401852	66.36	71.58	84	66	31	73	41	80	68	34	73	-5	2	8	11	0	106	153
1			1		65	58.1808			0	2014-05-14	2017-07-31		1	2016-03-24 15:47:24	2016-04-11	169.5	80		0	0	1174						0	4	2	0.540087	0.350978	72.98	73.84	84	77	49	69	89	87	81	51	84	4	5	1	4	21	93	122
1			1		85	78.1671			0	2014-02-11	2017-07-31		2	2013-07-25 19:00:46	2017-07-15	158	62		0	0	1266						0	4	8	0.66247	0.452163	43.23	42.4	62	36	10	36	74	63	36	13	39	2	0	-2	27	8	122	187
1			1		66	57.9041			0	2013-10-21	2017-07-31		16	2017-04-16 14:29:40	2017-07-18	155	72		0	0	1379						2	6	4	0.608655	0.447006	51.93	51.5	59	38	9	33	77	63	40	13	40	7	6	-1	43	20	107	173
1			1		54	52.0575	2016-11-28	20161128	1	2014-06-26	2016-11-28	26	1	2016-11-09 13:23:33	2016-12-14	174	68	8.6	0	0	886		2	Meningitis			0	0	3	0.494008	0.356252	72.42	78.53	88	79	48	93	86	87	85	65	113	-1	7	8	36	22	98	131
1			1		77	71.9644			0	2016-09-09	2017-07-31		3	2016-03-30 13:34:48	2017-07-11	161	53		0	0	325						0	4	7	0.627323	0.385403	57.66	64.85	100	74	30	58	91	99	83	39	73	-1	11	12	33	26	110	136
1			1		79	75.0192			0	2017-01-16	2017-07-31		4	2017-02-28 10:50:58	2017-07-26	160	79		0	0	196						1	4	6	0.660362	0.44196	41.05	40.19	94	51	18	43	111	91	48	15	47	-3	-5	-2	-16	10	120	163
1			1		63	58.9123			0	2017-03-24	2017-07-31		0		2017-07-10	163	44		0	0	129						0	0	2	0.567302	0.401116	73.11	69.94	101	92	63	50	85	100	87	46	63	-1	-5	-4	-27	26	95	94
1			1		70	64.2466			0	2015-09-07	2017-07-31		0		2017-03-07	167	84	Y	0	0	693						0	0	3	0.574888	0.326813	57.66	64.85	100	74	30	58	91	99	83	39	73	-1	11	12	33	26	110	136
1			1		84	78.4877			0	2016-03-15	2017-07-31		0		2017-07-25	154	63		0	0	503						0	4	4	0.694754	0.428567	67.62	65.41	103	93	42	86	110	106	92	36	92	2	-1	-3	-13	6	89	82
1			1		48	44.2959			0	2017-04-10	2017-07-31		1	2017-06-03 19:58:49	2017-07-26	177	80		0	0	112						0	4	3	0.455178	0.344955	73.23	73.59	86	77	53	62	69	85	77	54	58	-1	0	0	3	-7	87	102
1			1		57	51.1808			0	2015-12-16	2017-07-31		0		2017-01-03	164	75		0	0	593						0	1	4	0.551193	0.330207	75.23	74.25	75	69	43	98	87	74	67	39	93	-1	-2	-1	-9	-5	79	95
1			1		81	75.2795			0	2016-01-29	2017-07-31		1	2012-03-11 13:46:43	2017-07-12	176	91		0	0	549						0	4	5	0.565587	0.432769	70.97	67.9	64	60	38	63	68	63	56	26	66	-1	-5	-4	-33	4	93	148
1			1		69	61.0329			0	2013-11-18	2017-07-31		3	2014-06-06 11:11:41	2016-10-03	167	106		1	0	1351						2	0	3	0.570106	0.313682	67.55	63.91	75	64	32	58	78	73	59	26	54	-2	-7	-5	-18	-7	86	114
1			1		73	67.5781			0	2015-12-01	2017-07-31		1	2015-03-22 15:21:05	2017-06-08	167	65		0	0	608						0	6	3	0.582402	0.404034	55.64	58.49	72	51	22	42	78	84	63	27	47	16	22	5	24	12	111	181
1			1		61	54.0603			0	2014-07-21	2017-07-31		3	2015-01-07 10:25:42	2017-07-10	158	75	60	0	0	1106						0	0	3	0.572012	0.347454	70.28	68.79	98	85	43	82	118	98	82	39	88	-1	-3	-2	-9	7	112	143
1			1		73	66.0575			0	2014-05-19	2017-07-31		2	2016-03-06 21:07:09	2017-04-05	167	100		0	0	1169						1	6	3	0.597874	0.380891	58.99	59.37	72	55	24	55	80	79	60	25	57	9	10	1	1	5	87	120
1			1		71	66.5397			0	2017-05-17	2017-07-31		0		2017-06-27	160	58		0	0	75						0	4	4	0.627521	0.431025	63.22	72.29	79	64	32	37	72	75	70	39	63	-4	9	14	23	70	81	91
1			1		78	73.4466			0	2017-05-01	2017-07-31		0		2017-07-31	169	74		0	0	91						0	6	4	0.599278	0.371694	73.97	74.44	81	78	57	48	91	85	82	54	79	5	6	1	-5	64	90	115
1			1		67	62.7562			0	2016-11-17	2017-07-31		4	2017-03-18 12:39:26	2017-06-15	160	93		0	0	256						0	6	8	0.600332	0.399128	66.09	63.82	53	44		35	110	53	43	17	30	1	-3	-3		-13	107	154
1			1		78	70.874			0	2013-12-02	2017-07-31		5	2017-05-08 14:11:28	2017-07-26	166	62	50	1	0	1337						3	6	8	0.61074	0.45491	45.91	45.68	65	39	11	31	69	72	43	13	42	11	10	-1	17	35	106	165
1			1		74	69.3041			0	2016-11-03	2017-07-31		8	2017-07-19 10:56:10	2017-07-27	166	80	20	0	0	270						0	4	11	0.599195	0.328757	73.11		91	86	55	74	92										90	98
1			1		65	59.2767		20171110	2	2015-08-21	2017-07-31	18	4	2016-04-09 11:16:59	2017-07-21	164	54		0	0	710		1		Pneumonia, COPD AE		4	6	4	0.551133	0.546491	44.95	44.19	59	33	12	29	76	60	33	13	24	3	1	-2	9	-15	137	277
1			1		83	77.2959			0	2015-05-12	2017-07-31		0		2015-11-24	161	63		0	0	811						0	0	4	0.665571	0.398239	67.45	70.07	77	69	33	44	83	74	69	37	61	-4	-1	4	10	38	75	80
1			1		88	84.474	2019-01-22	20190122	2	2015-07-27	2017-07-31	10	2	2015-07-25 17:26:22	2017-07-27 19:28:08	168	55		0	0	735		2				0	0	6	0.620814	0.520994	57.02		58	45	24	22	38										110	184
1			1		92	85.2438			0	2014-09-18	2017-07-31		2	2015-06-07 14:18:29	2017-07-05	153	67		0	0	1047						0	4	9	0.707482	0.38057	68.68	69.44	87	83	45	35	74	84	82	40	42	-3	-2	1	-10	19	91	104
1			1		79	74.5699			0	2017-01-17	2017-07-31		0		2017-07-14	160	73		0	0	195						0	4	4	0.64627	0.416483	70.35	66.58	73	67	40	38	72	95	83	36	73	30	23	-5	-10	93	82	99
1			1		71	64.7151			0	2014-09-22	2017-07-31		0		2017-07-18	166	52		0	0	1043						0	4	4	0.572689	0.365042	49.82	49.53	51	32	12	24	57	55	35	13	28	9	8	-1	10	15	112	217
1			1		94	86.5836			0	2014-02-10	2017-07-31		0		2015-03-19	164	80		0	0	1267						0	4	5	0.68848	0.552697	56.71	59.18	76	60	25	50	89	82	67	26	55	8	13	4	6	9	87	107
1			1		91	84.4438			0	2014-06-26	2017-07-31		0		2017-07-19	157	63		0	0	1131						0	4	5	0.692955	0.425575	60.43	60.59	69	57	27	29	76	72	60	27	32	6	6	0	-2	8	97	133
1			1		65	58.2027			0	2014-04-29	2017-07-31		1	2012-02-19 19:58:39	2017-06-05	170	97		1	0	1189						0	6	5	0.53778	0.446831	71.37		58	52	31	44	63										84	139
1			1		96	88.8247			0	2014-01-09	2017-07-31		1	2012-06-19 12:34:02	2017-06-08	158	52	28	0	0	1299						0	4	7	0.702609	0.431857	60.96	62.39	92	79	35	64	91	105	93	39	83	14	17	2	14	28	103	123
1			1		64	56.7233			0	2014-02-26	2017-07-31		0		2017-07-26	159	77		0	0	1251						0	0	5	0.574287	0.410695	69.52	66.66	69	59	27	68	91	75	62	28	79	8	4	-4	4	15	104	168
1			1		74	72.3644	2017-08-21	20170821	2	2015-06-23	2017-07-31	18	3	2015-05-27 13:01:11	2017-06-14	170	63	NA	0	0	769		1		no data available; died in hospital		2	6	5	0.5773	0.421784	47.28	45.35	50	31	11	26	51	51	30	11	39	2	-2	-4	-4	50	117	226
1			1		76	69.863			0	2015-02-09	2017-07-31		1	2007-11-21 08:35:50	2017-01-20	150	56		0	0	903						0	0	5	0.673488	0.564925	67.01	69.96	95	81	43	55	84	96	86	37	69	2	6	4	-15	27	89	89
1			1		52	45.874			0	2015-05-21	2017-07-31		1	2015-03-30 13:56:07	2016-09-12	173	77		0	0	802						0	4	1	0.495532	0.423126	64.45	66.61	85	67	34	68	93	84	68	36	71	-1	2	3	6	5	93	123
1			1		50	42.7781			0	2014-02-12	2017-07-31		0		2016-08-25	167	69		1	0	1265						0	0	1	0.490526	0.357572	67.88	70.25	95	74	37	91	80	95	77	37	98	0	4	3	0	8	101	122
1			1		75	68.5753			0	2015-05-04	2017-07-31		2	2015-06-22 20:09:34	2017-07-31	175	101		0	0	819						0	1	3	0.57523	0.364298	65.06	61.82	55	46	23	53	67	55	44	19	56	0	-5	-5	-16	6	72	109
1			1		65	59.5562			0	2015-11-25	2017-07-31		1	2015-11-23 13:46:56	2017-07-05	165	95		0	0	614						1	0	1	0.578973	0.421582	57.68	59.16	69	50	21	47	77	74	55	23	51	7	10	3	11	8	91	138
1			1		71	66.2877			0	2016-10-06	2017-07-31		1	2016-09-26 10:43:06	2017-05-18	166	74	40	0	0	298						0	4	5	0.5903	0.312751	65.09	66.99	82	68	32	57	96	78	67	32	54	-5	-2	3	-1	-7	99	135
1			1		71	64.9178			0	2014-12-18	2017-07-31		1	2016-03-04 10:52:40	2017-07-24	169	73		0	0	956						0	4	3	0.588603	0.400126	49.47	52.01	100	63	24	58	96	106	70	30	57	5	11	5	27	-1	102	117
1			1		61	55.7178			0	2015-10-26	2017-07-31		2	2011-08-09 14:34:49	2017-07-18	173	58		0	0	644						0	4	6	0.506291	0.383724	70.86	69.61	84	74	43	90	65	84	73	38	91	-1	-2	-2	-12	1	94	125
1			1		83	75.7507			0	2013-11-07	2017-07-31		0		2016-04-27	170	60	Y	0	0	1362						0	4	4	0.604052	0.403613	65.93	67.81	78	68	35	76	66	81	73	37	77	3	6	3	6	2	88	112
1			1		74	69.2438		20170602	1	2016-05-23	2017-06-02	04	1	2017-04-17 14:15:37	2017-05-08	147	51		0	0	375		2				0	0	9	0.69326	0.40349	67.6	68.23	58	50	27	19	87	61	53	26	25	6	7	1	-4	31	79	106
1			1		82	77.5534			0	2016-11-28	2017-07-31		2	2016-11-09 13:36:14	2017-07-20	162	63		0	0	245						0	4	5	0.666472	0.564173	63.59	62.39	75	64	42	28	72	73	61	37	24	-3	-5	-2	-11	-14	72	75
1			1		70	65.5589			0	2017-06-08	2017-07-31		2	2017-05-30 21:40:39	2017-07-20	157	56	Y	0	0	53						1	4	6	0.635758	0.416443	56.86	60.3	74	53	28	41	84	76	58	25	37	2	9	6	-14	-10	94	130
1			1		80	72.4055			0	2013-09-12	2017-07-31		10	2013-11-05 22:19:04	2017-05-24	171	79		0	0	1418						0	4	11	0.588185	0.514243	74.6		90	88	63	84	110										96	117
1			1		72	65.2849			0	2014-09-19	2017-07-31		5	2015-09-08 10:12:49	2017-07-28	173	66	Y	0	0	1046						0	4	10	0.5653	0.400033	68.09	70.46	87	76	46	66	89	86	78	49	72	-1	2	3	7	10	85	93
1			1		80	76.0329			0	2017-05-10	2017-07-31		2	2014-12-16 19:48:02	2017-07-19	161	73		0	0	82						0	6	8	0.660129	0.378873	68.69	67.79	75	68	34	51	87	73	65	33	40	-2	-4	-1	-2	-21	76	86
1			1		67	60.4055			0	2014-05-26	2017-07-31		0		2017-06-26	163	77		0	0	1162						0	6	4	0.599606	0.440099	67.74	67.86	79	67	34	63	77	81	69	34	50	3	3	0	0	-21	71	67
1			1		85	80.7452	2018-04-12	20180412	2	2014-03-19	2017-07-31	01	3	2017-04-19 14:52:58	2017-07-17	166	74	80	1	0	1230		2				0	6	12	0.638985	0.303421	55.28		75	56	24	40	88										109	163
1			1		57	50.3726			0	2014-12-12	2017-07-31		3	2017-01-06 08:42:01	2017-07-31	167	77		0	0	962						1	6	3	0.526698	0.462405	55.28		75	56	24	40	88										109	163
1			1		87	80.8767			0	2015-09-29	2017-07-31		1	2015-09-25 21:47:43	2017-07-13	169	65		0	0	671						0	6	7	0.608639	0.456735	63.79	56.23	51	44	26	28	54	64	48	20	36	24	9	-12	-25	30	103	178
1			1		88	86.011	2018-06-19	20180619	2	2016-10-17	2017-07-31	01	1	2016-05-15 10:05:16	2017-04-17	161	61		0	0	287		2				0	4	6	0.658226	0.5425	59.36	61.43	68	56	25	32	100	61	52	25	29	-10	-7	3	-1	-9	131	208
1			1		77	69.6603			0	2014-01-14	2017-07-31		5	2016-03-02 10:36:31	2016-04-13	171	53		0	0	1294						0	0	4	0.586071	0.540125	54.84	55.17	98	70	29	76	91	102	73	29	85	4	5	1	1	13	104	126
1			1		62	56.0795			0	2015-05-21	2017-07-31		0		2017-07-06	171	65	30	0	0	802						0	4	2	0.532804	0.413428	48.64	47.79	77	47	19	41	89	94	56	20	50	22	20	-2	5	23	115	197
1			1		69	64.063			0	2016-09-05	2017-07-31		0		2017-05-15	168	56		0	0	329						0	4	4	0.554713	0.445883	66.06	68.09	87	73	35	84	47	91	79	40	79	5	9	3	13	-6	95	120
1			1		93	86.1123		20150114	1	2014-09-25	2015-01-14	01	6	2015-01-13 11:27:39	2015-01-13 11:27:39	150	42	40	0	0	111		2			Lung ca +pneumonia +93歲	0	0	11	0.710688	0.402041	70.44	70.65	91	90	44	61	72	96	96	44	64	6	7	0	1	5	104	122
1			1		76	71.1863			0	2016-10-03	2017-07-31		5	2014-06-23 09:48:14	2016-10-03	163	68		0	0	301						0	0	6	0.6093	0.452675	70.78	75.04	97	88	48	84	103	97	94	61	86	0	6	6	27	2	106	131
1			1		87	82.9123	2019-11-15	20191115	2	2015-05-18	2017-07-31	18	2	2016-03-29 10:55:00	2016-04-08	175	54	40	0	0	805		1		DU bleeding UTI		1	4	6	0.60179	0.377936	55.82	54	54	41	21	23	65	55	40	22	33	2	-2	-3	2	43	105	185
1			1		74	67.589			0	2015-04-02	2017-07-31		3	2015-04-23 15:50:52	2017-07-21	163	64		0	0	851						3	6	4	0.596	0.583397	69.79	70.02	73	66	38	50	77	76	68	36	61	4	4	0	-5	22	97	141
1			1		73	66.5616			0	2014-12-01	2017-07-31		0		2017-07-27	165	79		0	0	973						0	4	6	0.599268	0.47038	61.95	60.91	75	59	28	47	90	72	56	23	51	-4	-6	-2	-19	9	97	139
1			1		64	58.5452			0	2015-09-22	2017-07-31		0		2017-06-26	163	76		0	0	678						0	4	3	0.564731	0.38196	72.75	72.33	74	67	42	55	89	77	70	41	68	4	3	-1	-4	22	99	148
1			1		63	58.1973		20170426	1	2016-07-12	2017-04-26	01	11	2017-04-02 12:06:42	2017-04-26 22:33:26	156	58		0	0	288		2				3	4	9	0.61091	0.407647	68.92	75.92	85	72	43	36	86	84	79	50	56	-1	9	10	17	55	84	88
1			1		66	60.8247			0	2016-05-17	2017-07-31		1	2009-11-06 10:51:39	2017-07-25	165	89		0	0	440						0	6	4	0.565832	0.393627	60.52	63.26	58	44	20	40	51	70	56	25	61	21	27	5	28	54	94	163
1			1		87	80.4329			0	2014-05-22	2017-07-31		4	2011-11-21 12:25:38	2017-01-16	163	94	60	0	0	1166						0	0	5	0.664714	0.441073	54.21	57.36	71	52	22	28	73	71	55	24	27	0	6	6	6	-5	91	124
1			1		83	76.7726		20210516	2	2015-05-19	2017-07-31	12	1	2017-02-03 09:17:49	2017-06-15	170	67		0	0	804		2				0	4	4	0.608551	0.397344	60.11	64.28	78	62	30	52	71	82	70	36	56	5	13	7	22	8	96	132
1			1		69	62.4082			0	2014-09-11	2017-07-31		1	2013-09-25 18:18:52	2017-03-14	161	68	>30	0	0	1054						0	0	3	0.588336	0.423171	71.96	74.44	125	114	60	97	138	126	118	70	107	0	4	3	17	10	118	113
1			1		83	75.3973		20210612	2	2014-01-17	2017-07-31	11	1	2010-03-17 15:48:20	2015-06-09	165	100		0	0	1291		2				0	1	4	0.623093	0.324619	61.69	69.9	53	43	20	46	46	58	53	17	54	8	23	13	-11	19	86	138
1			1		66	59.4082	Critical	20170726	1	2015-02-06	2017-07-26	18	10	2017-07-03 18:44:51	2017-07-04	160	48		1	0	901		1		Pneumonia, COPD AE		8	6	2	0.584933	0.434989	41.04	42.65	60	31	11	34	51	58	31	10	34	-2	1	4	-7	1	116	214
1			1		69	63.2712			0	2015-10-20	2017-07-31		0		2016-07-13	163	72		0	0	650						0	0	4	0.593756	0.551028	68.8	67.88	91	79	43	65	104	96	82	44	72	5	4	-1	3	10	97	115
1			1		60	54.2164			0	2015-03-10	2017-07-31		1	2015-03-12 14:33:17	2017-06-28	168	71		0	0	874	in-patient; several data being consistant					0	6	2	0.529539	0.355403	45.41		32	18	6	17	39										104	247
1			1		72	67.1534			0	2016-03-28	2017-07-31		0		2017-05-09	166	71		0	0	490						0	6	6	0.568847	0.583636	65.66	59.72	89	75	40	62	86	93	71	30	64	4	-5	-9	-24	3	118	174
1			1		57	49.8904			0	2014-03-14	2017-07-31		1	2012-11-09 13:26:37	2017-05-01	173	80		0	0	1235						0	6	2	0.520755	0.443616	64.8	71.55	76	61	22	78	100	81	72	40	95	7	18	10	85	22	86	102
1			1		60	54.2411	2019-11-05	20191105	2	2013-11-29	2017-07-31	14	1	2011-03-06 08:13:35	2017-07-26	162	66	Y	1	0	1340		2				0	6	3	0.560977	0.300953	51.8	52.04	77	49	13	60	100	89	57	20	71	15	15	0	50	17	120	187
1			1		64	57.4493			0	2014-08-13	2017-07-31		1	2014-08-17 13:53:07	2017-06-27	169	76		0	0	1083						0	0	4	0.537115	0.419828	74.52		91	85	48	79	101										100	119
1			1		75	70.4521			0	2016-07-14	2017-07-31		0		2017-07-29	165	77		0	0	382						0	4	4	0.603749	0.356324	52.42	51.26	93	63	25	44	91	96	63	23	60	3	1	-2	-7	36	117	165
1			1		90	82.3534	Critical	20160528	1	2014-04-17	2016-05-28	18	3	2016-05-20 15:06:34	2016-05-20 15:06:34	152	48		0	0	772		1		COPD AE		2	4	12	0.698043	0.403754	41.63	41.21	80	45	16	29	92	85	48	16	32	6	5	-1	3	12	138	201
1			1		67	60.4685			0	2015-06-04	2017-07-31		1	2012-09-04 12:06:17	2015-12-23	170	96	20	0	0	788						0	0	2	0.557515	0.537112	63.67	73.29	76	61	42	51	95	86	79	51	63	12	29	15	22	24	96	141
1			1		58	50.8685			0	2013-12-19	2017-07-31		4	2015-04-08 10:02:09	2017-07-25	169	81		0	0	1320						0	0	6	0.510971	0.376573	70.7	69.3	83	72	41	64	70	83	71	37	66	0	-2	-2	-10	2	92	121
1			1		64	56.1534			0	2013-10-17	2017-07-31		0		2017-06-08	166	66		0	0	1383						0	4	2	0.548143	0.358622	68.21	67.87	70	59	31	44	82	78	66	32	65	12	11	0	4	48	96	151
1			1		89	81.7945			0	2013-12-12	2017-07-31		3	2017-02-24 16:23:30	2017-07-25	151	46		0	0	1327						1	4	8	0.721117	0.425641	51.01	52.86	77	54	17	30	92	80	58	18	37	4	8	4	7	23	102	133
1			1		69	64.1041			0	2016-06-20	2017-07-31		0		2017-07-20	159	80		0	0	406						0	4	5	0.617731	0.50706	69.87	69.03	86	76	40	61	78	90	79	38	66	6	4	-1	-4	8	80	80
1			1		69	61.0466			0	2013-10-28	2017-07-31		0		2017-06-05	166	46		0	0	1372						0	0	3	0.566655	0.340683	69.64	70.92	54	48	25	44	56	58	52	28	45	7	8	2	15	2	82	132
1			1		86	82.0192		20170305	1	2017-02-22	2017-03-05	01	1	2017-02-20 09:36:56	2017-02-28 17:40:06	161	42.5		0	0	11		2				0	4	7	0.649697	0.466525	55.17	55.8	69	51	25	31	34	74	56	26	32	8	10	1	4	2	106	158
1			1		71	66.8685			0	2017-06-16	2017-07-31		0		2017-07-13	168	67		0	0	45						0	4	3	0.581349	0.541616	58	56.14	103	76	28	75	103	105	75	26	79	2	-1	-3	-7	6	113	142
1			1		55	49.0274			0	2015-03-05	2017-07-31		0		2015-05-28	167	63	64	1	0	879						0	0	1	0.523912	0.410628	72.24	76.58	56	50	30	53	64	55	51	37	70	-3	3	6	25	33	78	130
1			1		74	68.2849			0	2015-04-07	2017-07-31		1	2012-06-08 12:00:41	2017-07-25	167	70		1	0	846						0	4	5	0.590882	0.429118	63.31	64.78	70	57	23	62	91	72	60	24	67	3	5	2	4	7	101	153
1			1		74	66.4493			0	2014-04-21	2017-07-31		0		2016-05-05	167	69	20	0	0	1197						0	4	3	0.597945	0.419898	62.4	62.09	92	74	32	102	93	94	75	32	108	2	1	0	-1	6	90	96
1			1		80	74.2986	2019-12-28	20191228	2	2014-02-25	2017-07-31	01	3	2016-06-13 12:28:04	2016-09-26	162	58		0	0	1252		2				0	4	9	0.629838	0.358293	68.3	71.31	91	82	53	54	61	90	85	48	63	-1	3	4	-8	18	87	91
1			1		87	83.6219	2019-02-16	20190216	2	2015-10-06	2017-07-31	31	2	2013-01-18 13:36:29	2015-10-06	156	60		1	0	664		2				0	2	6	0.711797	0.436389	57.63		83	66	39	36	97										89	104
1			1		90	83.263	no	20150417	1	2014-09-23	2015-04-17	18	2	2015-02-09 22:30:10	2015-04-14	168	71	Y	1	0	206		1		not in-patient mortality; COPD AE		1	6	12	0.642986	0.421701	65.55	66.81	88	79	51	75	90	89	80	45	88	0	2	2	-12	18	94	114
1			1		74	67.8274		20150924	1	2014-10-13	2015-09-24	01	5	2015-07-29 21:32:34	2015-09-24 05:35:18	158	68	Y	0	0	346		2				5	1	6	0.62477	0.408145	64.42	69.42	92	76	53	66	59	95	84	42	63	3	11	8	-21	-5	90	95
1			1		73	69.3589			0	2017-07-04	2017-07-31		0		2017-07-11	164.5	74		0	0	27						0	6	3	0.615584	0.43532	65.42	66.67	66	56	27	48	76	66	57	29	40	-1	1	2	7	-18	82	114
1			1		81	74.7151			0	2015-04-08	2017-07-31		3	2015-06-18 13:02:34	2017-07-12	165	68	Y	1	0	845						1	4	4	0.635752	0.408353	59.56	64.05	77	60	25	54	80	80	67	35	47	4	12	8	41	-13	88	110
1			1		61	53.0712	no	20190717	2	2013-12-31	2017-07-31	18	4	2016-02-19 19:30:30	2016-05-05	158	55		1	0	1308		1		not in-patient mortality; COPD AE		3	6	4	0.589888	0.418843	50.89	50.77	64	40	13	37	52	66	41	13	46	3	3	0	1	22	86	129
1			1		60	54.8795	2020-09-04	20200904	2	2015-10-05	2017-07-31	26	1	2013-08-22 10:33:32	2017-07-07	164	50		0	0	665		2				0	0	2	0.539837	0.481878	69.28	71	88	75	42	61	39	86	76	43	67	-2	1	2	4	9	87	94
1			1		61	57.0521			0	2017-01-11	2017-07-31		0		2017-01-11	179	84	40	0	0	201						0	4	2	0.498806	0.36583	70.2	69.17	92	82	50	105	86	95	83	45	111	3	1	-1	-9	6	93	108
1			1		68	59.874			0	2013-09-26	2017-07-31		0		2016-07-04	166	65		0	0	1404						0	0	1	0.543915	0.298887	71.83	72.53	113	102	60	88	109	112	102	60	92	-1	0	1	-1	5	120	144
1			1		87	79.4			0	2013-10-03	2017-07-31		1	2013-09-30 08:37:48	2013-12-30	163	60		0	0	1397						0	0	6	0.634378	0.317988	62.1	61.82	70	58	27	38	70	64	54	20	37	-7	-8	0	-24	-2	107	163
1			1		59	51.8274			0	2014-04-10	2017-07-31		0		2014-05-29	172	65		0	0	1208						0	0	2	0.479866	0.460738	52.02	49.29	89	57	26	44	79	92	56	23	45	4	-2	-5	-10	2	136	248
1			1		74	69.2904			0	2016-09-08	2017-07-31		1	2016-09-07 18:52:48	2017-02-09	161	71		0	0	326						0	4	3	0.606165	0.413424	67.66	73.49	62	54	33	28	62	70	67	45	34	15	24	9	39	18	98	156
1			1		70	63.0575		20150219	1	2014-03-10	2015-02-19	01	4	2015-01-06 12:18:02	2016-05-28	163	53	50	0	0	346		2				0	1	5	0.592983	0.489698	65.09	60.34	73	60	31	40	72	72	55	28	37	-1	-8	-7	-9	-9	88	119
1			1		81	74.2548	2021-06-16	20210616	2	2014-03-20	2017-07-31	12	2	2014-05-17 14:05:44	2017-01-26	160	51		0	0	1229	discharged 8 days ago; PFT data were reliable	2				0	4	5	0.657903	0.479044	40.37		52	28	10	17	28										89	137
1			1		71	64.6521			0	2015-08-03	2017-07-31		2	2017-05-06 19:14:12	2017-06-14	160	47		0	0	728						4	6	4	0.609802	0.569157	45.26	45.22	62	35	12	24	64	62	35	11	28	0	0	0	-6	20	110	189
1			1		80	78.9808	2015-11-09	20151109	1	2014-06-12	2015-11-09	18	4	2015-11-07 11:23:44	2015-11-24	165	59	NA	0	0	515		1	Pneumonia, ARDS, Sepsis	Pneumonia, COPD AE		2	0	5	0.648131	0.536175	66.51	64.66	76	68	73	48	122	71	61	46	25	-7	-9	-3	-37	-48	98	137
1			1		85	77.8959			0	2014-06-17	2017-07-31		3	2016-09-06 11:23:25	2017-07-31	166	69		0	0	1140						0	6	5	0.613138	0.452496	50.94	53.9	62	42	19	31	52	70	50	20	33	13	19	6	9	5	116	196
1			1		71	63.9945			0	2014-07-14	2017-07-31		0		2017-06-12	163	62		0	0	1113						0	4	3	0.579547	0.499842	60.23	62.44	57	43	16	47	29	54	42	12	47	-5	-2	4	-28	1	91	153
1			1		69	62.3945			0	2014-07-31	2017-07-31		1	2015-09-22 20:39:47	2017-06-27 03:47:32	165	69	40	0	0	1096						0	4	5	0.557346	0.522413	54.38	53.08	61	42	19	27	55	65	44	19	29	8	5	-2	1	10	117	216
1			1		79	73.6658			0	2016-05-02	2017-07-31		0		2017-05-10	162	69		0	0	455						0	4	7	0.640151	0.509082	65.91	67.3	96	83	37	78	109	100	88	42	87	4	6	2	13	12	96	105
1			1		69	62.4219			0	2014-10-06	2017-07-31		0		2016-01-02 15:24:40	172	72		0	0	1029	PFT data were reliable; only one data; MBD in the ER					0	4	4	0.544576	0.336759	37.81	35.46	49	24	10	21	53	54	24	11	19	9	2	-6	5	-9	117	244
1			1		86	79.2411			0	2014-11-13	2017-07-31		0		2014-12-02	166	51		0	0	991						0	0	4	0.627204	0.549534	58.22	64.62	64	50	22	42	78	59	51	27	47	-7	3	11	21	13	109	175
1			1		61	54.5616			0	2014-11-21	2017-07-31		0		2017-06-16	170	78	Y	0	0	983						0	0	2	0.531463	0.516968	65.46	68.04	88	72	35	58	88	91	77	40	84	3	7	4	13	44	96	121
1			1		87	80.9616		20190213	2	2014-12-03	2017-07-31	18	1	2014-12-02 17:21:48	2014-12-10	158	62		0	0	971		1		Non-inpatient death		0	0	10	0.684058	0.360032	57.41		75	59	22	48	76										93	120
1			1		66	60.5041			0	2016-03-07	2017-07-31		1	2014-12-22 17:32:28	2017-04-28	160	70		0	0	511	PFT data were reliable; having URI; 2015/3/6 FEV1:43					0	4	3	0.59777	0.461733	41.16	40.58	48	25	8	21	49	52	26	8	17	7	5	-1	-1	-22	106	204
1			1		74	68.063		20150810	1	2015-01-26	2015-08-10	01	0		2015-03-31	156	58		0	0	196		2				0	0	3	0.648791	0.548267	62.01	61.57	77	61	25	40	82	71	56	22	31	-8	-9	-1	-13	-21	87	109
1			1		87	80.5041		20160129	1	2015-02-02	2016-01-29	01	0		2015-02-24	164	60		0	0	361		2			Lung ca	0	0	7	0.644592	0.472117	67.96	68.89	88	81	44	53	101	89	83	46	50	1	3	1	6	-6	101	129
1			1		73	66.5288			0	2015-02-13	2017-07-31		0		2015-02-13	172	62		0	0	899						0	1	3	0.559637	0.442762	62.56	64	54	43	19	44	69	56	46	20	52	5	7	2	6	17	96	173
1			1		70	64.1288		20170711	1	2015-04-30	2017-07-11	01	0		2017-07-07 17:49:51	174	85		0	0	803		2				0	4	6	0.546661	0.501321	68.21	69.16	80	70	43	64	85	85	75	44	79	5	7	1	4	23	93	126
1			1		74	67.4849	2015/8/10 OPD	20160829	1	2015-06-01	2016-08-29	18	1	2015-06-05 10:42:27	2015-08-10	170	54		0	0	455		1		Non-inpatient death		0	4	3	0.595632	0.335005	40.35	40.13	59	31	13	18	68	59	31	12	26	1	0	-1	-4	41	98	170
1			1		68	61.537			0	2015-06-16	2017-07-31		7	2016-10-28 14:41:05	2017-07-14	165	89	Y	0	0	776						0	4	15	0.590492	0.507891	69.83	68.82	72	64	33	72	86	74	65	34	76	3	1	-1	1	5	77	93
1			0		74	67.674		20200414	2	2015-07-07	2017-07-31	14	1	2015-06-28 21:15:15	2015-09-04	152	57	NA	0	0	755		2				0	0	2	0.660054	0.414071	61.56	59.16	67	50	18	29	76	68	49	16	37	1	-3	-4	-12	29	87	125
1			1		36	30.4603			0	2015-09-01	2017-07-31		0		2015-09-08	180	63	14	0	0	699						0	0	1	0.396513	0.544772	60.02	63.19	93	64	34	63	67	93	68	37	54	0	5	5	9	-15	99	117
1			1		62	56.3753			0	2015-10-06	2017-07-31		0		2016-05-25	170	63		0	0	664						0	2	2	0.535252	0.32844	43.93		69	38	16	50	69										114	207
1			1		78	72.0959			0	2015-11-25	2017-07-31		5	2016-05-11 13:59:24	2017-05-12	167	62.5		1	0	614						1	4	11	0.601153	0.471934	52.99	52.85	62	43	20	26	67	71	49	21	32	15	14	0	6	26	106	178
1			1		83	78.2877		20191110	2	2016-04-11	2017-07-31	36	3	2016-07-15 14:17:41	2017-07-10	162	58		0	0	476		2				2	6	7	0.672552	0.502799	53.31	47.31	55	39	15	23	68	59	37	14	37	8	-5	-11	-2	58	79	112
1			1		66	61.1096			0	2016-04-27	2017-07-31		1	2016-04-26 19:49:06	2016-10-14	165	52		0	0	460						0	4	3	0.576617	0.525464	51.12		62	40	14	36	61										100	172
1			1		57	51.789			0	2016-06-16	2017-07-31		0		2016-06-16	168	62		0	0	410						0	4	2	0.526361	0.533652	63.72	64.83	95	74	37	54	90	98	78	37	74	3	5	2	-1	37	102	129
1			1		73	68		20171114	2	2016-06-20	2017-07-31	01	0		2016-06-29	162	78	40	0	0	406		2				0	0	4	0.613591	0.381056	69.75	65.29	98	88	49	75	99	99	83	39	84	1	-5	-6	-21	12	94	99
1			1		53	51.263	2018-06-11	20180611	2	2016-07-15	2017-07-31	01	2	2016-12-06 12:11:27	2017-04-11	170	61		0	0	381		2				0	4	4	0.508483	0.352379	42.58	38.88	65	34	14	24	70	66	32	12	32	1	-7	-9	-12	34	123	251
1			1		87	82.5781		20171006	2	2016-09-07	2017-07-31	12	3	2017-01-22 13:30:20	2017-07-25	155	57		0	0	327		2				0	4	11	0.700633	0.479323	63.42	64.64	79	69	26	55	82	82	72	28	52	3	5	2	7	-6	89	106
1			1		89	84.0164	Critical	20201215	2	2016-08-24	2017-07-31	18	1	2016-08-24 14:00:34	2017-07-10	162	62		0	0	341		1		Pneumonia, COPD AE		1	4	6	0.685159	0.468651	42.02	44.37	76	44	15	27	72	76	46	18	29	0	6	6	16	7	102	141
1			1		72	67.674		20170226	1	2016-11-24	2017-02-26	01	1	2016-12-12 11:07:31	2017-01-05	167	46	40	0	0	94		2				0	4	5	0.587187	0.45772	71.53	68.06	57	52	34	41	43	54	48	25	37	-4	-9	-5	-26	-9	73	104
1			1		76	71.9041			0	2017-02-10	2017-07-31		0		2017-02-13	156.5	58		0	0	171						0	6	4	0.635722	0.497706	68.73	63.13	90	80	39	82	92	95	78	31	80	6	-3	-8	-20	-3	108	140
1			1		67	63.0027			0	2017-07-06	2017-07-31		1	2017-05-21 13:37:51	2017-07-06	166	83		0	0	25						0	0	3	0.574083	0.466003	62.75	63.66	76	60	25	59	84	79	64	28	60	4	5	1	11	1	102	149
1			1		78	73.7233			0	2017-05-22	2017-07-31		2	2017-03-27 16:19:53	2017-07-24	170	48	50	0	0	70						0	4	5	0.605965	0.377471	64.03	65.94	79	66	33	87	82	76	66	36	44	-3	0	3	9	-49	88	112
1			1		67	62.8986			0	2017-05-10	2017-07-31		1	2017-05-08 14:44:06	2017-06-30	163	67		0	0	82						1	4	3	0.594254	0.466223	58.47	55.03	86	64	24	56	110	88	61	23	59	2	-4	-6	-6	6	110	157
1			1		81	77.0575			0	2017-07-03	2017-07-31		0		2017-07-03	160	62		0	0	28						0	4	4	0.65772	0.365806	62.18	50.71	76	63	42	30	84	79	53	32	20	4	-15	-18	-23	-35	94	123
1			1		82	75.9945			0	2015-08-24	2017-07-31		2	2017-01-16 20:48:55	2017-07-28	165	72		0	0	707						0	0	7	0.631647	0.433943	72.7	73.17	75	72	44	74	86	78	75	48	83	3	4	1	9	11	83	101
1			1		80	75.5644	2019-10-19	20191019	2	2015-05-11	2017-07-31	01	4	2016-02-13 11:27:22	2017-07-24	165	80		0	0	812		2				1	6	4	0.630207	0.402005	71.23	70.62	82	77	49	45	90	83	77	49	41	2	1	-1	1	-7	86	102
1			1		75	68.4932			0	2014-11-14	2017-07-31		5	2016-09-05 14:33:08	2017-07-26	165	62		1	0	990						3	4	5	0.602354	0.401715	63.66	65.67	87	71	30	92	92	90	76	33	98	3	7	3	13	8	99	126
1			1		80	73.0932			0	2014-10-01	2017-07-31		1	2013-12-06 17:47:49	2017-06-07	163	61		1	0	1034						0	4	5	0.616296	0.432726	57.59	58.84	67	51	20	51	76	73	56	19	61	9	11	2	-2	19	111	178
1			1		76	69.5014		20170330	1	2014-07-30	2017-03-30	26	0		2015-11-25	159	49		0	0	974		2				0	0	4	0.624257	0.487102	64.92	64.25	94	79	36	50	88	98	81	41	44	4	3	-1	15	-12	103	124
1			1		82	77.3014			0	2016-04-14	2017-07-31		0		2017-01-05	176	78		0	0	473						0	4	8	0.58745	0.443124	59.42	54.01	58	46	30	24	46	59	42	24	24	1	-8	-9	-22	-1	83	130
1			1		85	78.8438			0	2015-01-07	2017-07-31		0		2015-11-11	162	63		0	0	936						0	0	3	0.653514	0.465003	74.25	76.88	72	71	44	93	75	74	76	50	87	3	7	4	13	-6	77	91
1			1		72	65.6192	2020-08-29	20200829	2	2014-01-14	2017-07-31	18	11	2017-07-04 13:09:26	2017-07-31	162	60		0	0	1294	in-patient; FEV1 varialbe	1		Pneumonia, COPD AE		8	6	7	0.59823	0.455123	42.84	43.02	53	29	10	19	57	74	41	14	30	39	40	0	46	54	116	207
1			1		67	59.7945			0	2014-04-02	2017-07-31		1	2012-09-08 15:39:47	2017-05-31	168	76	30	1	0	1216						0	4	2	0.558211	0.478271	60.51	60.14	70	53	24	40	60	74	56	24	40	6	5	-1	-3	0	89	132
1			1		71	63.4658			0	2014-02-10	2017-07-31		4	2016-10-27 08:31:37	2017-07-20	171	77		0	0	1267						0	6	4	0.557214	0.390454	72.97	72.83	80	75	41	82	93	89	82	51	80	10	10	0	24	-3	91	114
1			1		58	54.7616	2017-07-02	20170702	1	2014-08-20	2017-07-02	01	16	2017-06-08 15:10:57	2017-07-21	168	53		0	0	1047		2	Pneumonia, COPD AE			4	6	10	0.53803	0.341875	70.27	74.26	82	72	43	72	78	83	76	51	68	0	6	6	18	-6	88	110
1			1		67	59.7753			0	2014-01-06	2017-07-31		0		2017-07-27	166	59		0	0	1302						0	4	3	0.545437	0.412837	55.88	58.06	84	59	23	62	69	94	69	27	77	12	16	4	21	25	119	185
1			1		87	84.4411	2016-03-11	20160311	1	2014-05-15	2016-03-11	01	9	2016-03-09 13:16:09	2016-03-09 13:16:09	150	58		0	0	666		2	Lung CA, Pneumonia, ESRD			0	4	11	0.709743	0.372217	61.69	61.75	90	77	29	72	107	97	83	26	84	8	8	0	-9	17	121	156
1			1		87	82.0411			0	2016-03-22	2017-07-31		1	2017-04-19 10:15:41	2017-04-27	166	75	NA	1	0	496						0	4	5	0.651276	0.49124	54.57	57.06	76	55	24	37	70	77	59	27	39	2	7	5	13	4	95	130
1			1		78	70.4959			0	2013-12-02	2017-07-31		4	2015-10-24 21:42:30	2017-06-08	158	61		0	0	1337						0	6	7	0.654802	0.409887	68.99	68.61	72	64	31	54	84	71	63	30	52	-1	-1	-1	-2	-3	73	79
1			1		88	81.4247		20191011	2	2014-10-20	2017-07-31	10	0		2014-10-27	170	67		0	0	1015		2				0	0	6	0.614718	0.394911	60.72		73	60	24	65	67										104	151
1			0		78	72.8466			0	2016-08-22	2017-07-31		0		2016-12-05	150	56	Y	0	0	343						0	4	4	0.659458	0.426342	67.21	68.32	102	85	31	67	76	107	90	35	69	5	7	2	11	3	108	134
1			1		81	74.2658	non-Critical; expired on the same day	20150709	1	2014-10-06	2015-07-09	18	3	2015-07-06 14:19:18	2015-07-06 14:19:18	159	45	60	0	0	276		1		Pneumonia, COPD AE	OPD f/u, why died?	2	4	7	0.639277	0.458191	60	61	120	94	40	76	120	116	93	40	79	-3	-2	2	0	3	124	141
1			1		86	78.5616			0	2013-09-25	2017-07-31		2	2009-06-15 09:18:31	2016-12-15	156	73		0	0	1405						0	0	6	0.672519	0.460623	70.4		72	68	34	50	82										91	118
1			1		65	58.811		20180910	2	2014-11-10	2017-07-31	16	3	2016-12-30 14:57:50	2017-06-20	169	75		1	0	994		1		Non-inpatient death		3	4	4	0.564764	0.393499	63.28	61.62	67	53	25	62	72	73	57	25	60	9	6	-3	0	-3	78	106
1			1		85	81.1068	2021-04-28	20210428	2	2017-02-20	2017-07-31	16	2	2016-04-13 09:54:55	2017-02-20	160	56	10	0	0	161		1		Pneumonia, COPD AE		0	4	5	0.670854	0.46068	62.3	69.95	89	75	34	82	72	83	79	42	83	-6	5	12	24	1	90	101
1			0		83	76.9123			0	2015-03-24	2017-07-31		1	2007-10-01 16:22:34	2017-07-27	150	56	Y	0	0	860						0	0	6	0.703179	0.439456	71.15		100	89	32	46	130										90	94
1			1		79	77.8548	2018-08-04	20180804	2	2017-03-20	2017-07-31	36	4	2017-04-18 14:00:36	2017-07-24	172	70		0	0	133		2				0	4	9	0.602985	0.464056	72.17	68.59	73	71	46	66	64	78	72	38	54	7	1	-5	-18	-19	79	98
1			1		84	77.7945			0	2014-10-03	2017-07-31		2	2014-10-02 14:54:11	2017-07-20	166	85	200	0	0	1032						0	0	4	0.631325	0.419802	69.69	71.72	87	81	49	51	87	92	88	50	66	6	9	3	2	28	89	102
1			1		80	73.6			0	2015-07-20	2017-07-31		0		2017-06-15	158	62		0	0	742						0	0	5	0.645639	0.416058	70.67	71.75	116	107	60	83	107	115	107	63	66	-1	1	2	4	-20	100	92
1			1		91	85.4603		20200901	2	2016-05-25	2017-07-31	18	1	2014-04-03 11:08:00	2017-07-28	154	46		0	0	432		1		Non-inpatient death		0	6	5	0.698776	0.306509	66.99	70.6	99	91	45	50	63	88	86	46	49	-11	-6	5	2	-2	96	101
1			1		64	60.4356			0	2017-07-03	2017-07-31		0		2017-07-31	173	68		0	0	28						0	4	3	0.538919	0.472422	74.63	76.27	67	63	44	65	66	73	70	52	75	9	11	2	19	15	76	101
1			1		93	86.9205			0	2015-04-08	2017-07-31		1	2010-10-07 10:15:48	2017-07-26	164	59		0	0	845						0	4	5	0.661429	0.403891	61.72	56.9	83	71	34	52	84	87	69	27	55	5	-3	-8	-21	7	109	148
1			1		85	81.4548		20170917	2	2017-07-26	2017-07-31	01	2	2017-07-20 20:32:01	2017-07-31	164	58		0	0	5		2				0	4	12	0.660537	0.385659	73.48	71.7	71	70	45	61	81	76	74	43	65	7	5	-2	-3	7	74	85
1			1		95	87.9068		20200314	2	2014-08-26	2017-07-31	11	1	2014-08-15 18:00:04	2017-06-06	172	49		0	0	1070		2				0	4	6	0.643311	0.457664	60.08	68.36	73	61	38	39	45	70	66	51	36	-4	9	14	32	-6	82	104
1			1		60	54.2356			0	2016-03-10	2017-07-31		4	2017-06-17 13:47:17	2017-07-27	160	57	30	0	0	508						4	6	2	0.573434	0.52295	41.42		67	34	11	27	79										120	220
1			1		80	75.1178			0	2016-11-24	2017-07-31		4	2013-12-09 13:53:12	2017-07-28	159	63		0	0	249						0	4	7	0.667144	0.531886	63.37	64.96	111	93	45	45	115	108	93	47	45	-2	0	3	5	0	92	79
1			1		93	85.2575			0	2013-12-05	2017-07-31		5	2016-06-18 18:04:19	2017-07-14	163	64		0	0	1334						4	6	7	0.679266	0.337922	72.17	73.25	94	94	51	119	88	93	94	57	106	-1	1	1	10	-11	77	66
1			1		86	81.9479			0	2016-12-12	2017-07-31		2	2016-07-17 13:45:52	2017-04-20	170	57		0	0	231						0	4	7	0.635294	0.383517	66.78	67.78	78	70	39	62	65	78	71	39	58	0	2	1	0	-7	77	88
1			1		88	80.5315			0	2014-05-05	2017-07-31		0		2017-07-27	165	78	30	0	0	1183						0	4	9	0.642733	0.461982	65.69	63.16	94	83	38	67	101	96	82	34	74	2	-2	-4	-11	10	102	121
1			1		90	82.7205			0	2014-08-04	2017-07-31		5	2016-04-03 12:58:43	2017-06-07	160	77		0	0	1092						3	6	8	0.684014	0.335993	55.76	52.83	58	44	15	36	40	56	40	14	27	-4	-9	-5	-10	-23	79	108
1			1		89	85.8767	2017-08-13	20170813	2	2014-02-24	2017-07-31	16	7	2017-07-24 11:52:12	2017-07-31 21:26:11	172	66		0	0	1253		1		Pneumonia, COPD AE		1	4	8	0.629907	0.467732	70.72	72.63	94	92	61	72	89	88	88	54	65	-7	-5	3	-11	-11	92	103
1			1		66	59.0301			0	2014-11-03	2017-07-31		0		2016-07-11	164	78		0	0	1001						0	6	2	0.577086	0.409331	62.96	64.92	106	84	39	87	124	108	88	45	100	1	5	3	17	14	110	128
1			1		66	61.2137			0	2016-06-29	2017-07-31		2	2016-06-26 22:25:16	2017-07-19	149	68		0	0	397						2	4	5	0.632757	0.311177	54.38	47.39	81	54	18	33	75	86	50	14	33	6	-7	-13	-21	1	119	174
1			1		83	76.5644			0	2014-11-04	2017-07-31		2	2015-12-24 21:30:52	2016-01-05	153.5	54		0	0	1000						1	4	5	0.681032	0.501128	42.87	38.81	70	40	14	35	49	73	37	11	32	3	-6	-9	-16	-8	109	159
1			1		63	57.2575			0	2015-06-29	2017-07-31		0		2017-01-12	150	57		0	0	763						0	0	2	0.62044	0.491802	67.66	67.59	96	80	37	46	109	101	83	34	61	4	4	0	-8	32	108	131
1			1		78	73.3507			0	2016-12-12	2017-07-31		6	2017-06-04 14:55:01	2017-07-04	158	63		0	0	231						1	4	8	0.650299	0.362528	66.59	60.79	72	63	35	27	62	84	66	30	29	16	6	-9	-15	5	83	103
1			1		72	67.4274	2020-11-20	20201120	2	2015-08-21	2017-07-31	36	4	2015-08-21 13:19:22	2017-07-03	158	45		0	0	710		2				0	2	5	0.631537	0.469943	65.15	65.77	104	86	38	66	112	104	87	39	71	0	1	1	4	7	102	110
1			1		88	83.0137			0	2016-11-07	2017-07-31		2	2017-07-06 13:50:00	2017-07-18	161	71	50	0	0	266						0	6	6	0.694172	0.450664	66.74	66.86	79	71	43	52	93	88	79	38	47	11	11	0	-12	-10	71	70
1			1		72	67.5699			0	2017-04-05	2017-07-31		0		2017-05-03	152.5	49		0	0	117						0	4	3	0.631646	0.438482	62.83	61.45	99	79	34	60	98	96	75	29	59	-3	-6	-2	-16	-2	125	165
1			1		76	68.789		20190501	2	2013-11-07	2017-07-31	36	2	2015-09-19 09:57:45	2015-12-21	158	62		0	0	1362		2				0	3	7	0.610769	0.428139	55.91	51.28	57	41	12	29	59	68	45	11	32	19	9	-8	-8	13	119	202
1			1		84	78.0247			0	2015-09-21	2017-07-31		3	2015-01-22 16:02:46	2017-07-21	158	68		0	0	679						0	4	10	0.6755	0.495548	57.25	57.96	79	60	25	49	56	84	65	24	52	6	8	1	-2	5	83	96
1			1		77	70.0247			0	2014-10-23	2017-07-31		0		2017-07-29	170	60		0	0	1012						0	0	4	0.570009	0.44944	68.75	70.26	67	60	33	57	75	78	71	39	76	17	19	2	20	33	101	163
1			1		84	79.1836			0	2016-12-05	2017-07-31		1	2011-05-13 07:32:53	2017-07-18	168	69		0	0	238						0	4	6	0.628145	0.452201	66.74	66.78	68	61	32	42	69	76	68	34	50	11	11	0	6	18	84	114
1			0		84	77.2877			0	2014-09-18	2017-07-31		6	2015-05-04 17:24:55	2017-07-26	145	50	NA	0	0	1047						2	4	4	0.688873	0.484014	54.97	55.35	90	63	18	27	95	88	62	15	30	-3	-2	1	-17	11	138	206
1			1		55	47.8575	2020-10-16	20201016	2	2013-09-09	2017-07-31	23	0		2017-07-24	175	62		0	0	1421		2				0	0	4	0.47453	0.542021	71.79	69.83	106	93	60	84	105	102	88	52	80	-3	-6	-3	-13	-5	108	124
1			1		84	82.337	2018-11-19	20181119	2	2016-07-11	2017-07-31	01	15	2017-05-05 10:17:43	2017-07-26	155	50		0	0	385		2				9	4	12	0.671761	0.348881	71.49	65.35	98	96	72	53	94	105	94	42	47	7	-2	-9	-42	-11	113	138
1			1		72	65.6603		20150918	1	2014-12-26	2015-09-18	01	10	2015-09-18 11:10:35	2015-09-18 11:10:35	168	50		0	0	266		2				2	0	8	0.578586	0.48296	62.32	61.19	64	51	27	31	64	68	53	26	30	6	4	-2	-2	-1	89	139
1			1		80	73.8548	critical AAD	20160720	1	2015-08-10	2016-07-20	16	3	2016-06-12 13:54:06	2016-06-12 13:54:06	168	58		0	0	345		1		COPD AE		0	4	7	0.604036	0.50387	73.74	73.54	58	56	41	33	53	62	60	38	38	7	7	0	-9	15	75	107
1			1		85	77.5726			0	2014-06-23	2017-07-31		3	2014-09-29 09:42:15	2017-07-25	163	53	Y	0	0	1134						0	4	11	0.648642	0.514514	70.66	68.72	86	81	42	102	78	92	84	39	122	6	3	-3	-5	21	79	77
1			1		72	67.6329			0	2016-09-21	2017-07-31		0		2017-05-31	168	65		0	0	313						0	4	4	0.585536	0.431623	61.45	60.41	49	39	17	38	47	51	40	16	42	4	2	-2	-8	12	83	144
1			1		79	71.3562			0	2014-03-13	2017-07-31		0		2017-05-16	167	66	5	0	0	1236						0	0	6	0.610714	0.498844	67.18	70.67	79	70	38	55	83	77	71	44	60	-3	2	5	14	9	84	100
1			1		80	72.8986		20180510	2	2014-10-06	2017-07-31	18	2	2012-08-17 10:36:36	2017-02-20	158	51		0	0	1029		1		not checked		0	6	4	0.664764	0.369367	46.91	46.79	80	49	15	29	94	85	52	16	32	6	6	0	2	9	103	141
1			0		64	59.3342			0	2016-11-30	2017-07-31		0		2017-07-17	153	54	30	0	0	243						0	6	2	0.602933	0.497741	70.86	71.6	117	99	45	73	144	115	98	45	77	-2	-1	1	-1	5	127	155
1			1		84	78.1096		20171002	2	2015-06-16	2017-07-31	18	5	2016-07-02 12:51:07	2017-04-17	158	46		0	0	776	in-patient; PFT data were consistent with another one data	1		not checked		4	4	4	0.635185	0.384901	44.49	42.47	47	28	10	20	58	52	29	9	22	9	4	-5	-10	12	143	263
1			1		85	79.0164		20161021	1	2015-08-12	2016-10-21	01	0		2016-11-18	156	51	33	0	0	436		2				0	0	10	0.664355	0.585827	69.58	70.03	81	75	42	34	56	84	79	42	37	5	5	1	-1	9	92	113
1			0		68	62.4082		20161008	1	2015-10-06	2016-10-08	01	6	2016-09-20 11:05:07	2016-11-15	149	53	NA	0	0	368		2			Lung ca	0	0	9	0.642119	0.434416	72.98		105	93	39	85	112										99	101
1			1		64	56.7836			0	2014-02-21	2017-07-31		6	2016-02-17 21:39:32	2017-06-17 09:09:56	165	81.2		0	0	1256						2	1	8	0.555047	0.384332	65.01	65.62	74	60	28	59	71	74	60	28	53	-1	0	1	1	-9	94	138
1			1		81	75.1753			0	2015-10-28	2017-07-31		2	2014-04-19 11:30:09	2017-07-24	153	59		1	0	642						1	6	5	0.667017	0.386883	45.96	43.64	67	40	13	22	73	68	39	13	22	2	-3	-5	1	1	126	199
1			1		61	55.126	2019-05-08	20190508	2	2013-11-21	2017-07-31	01	40	2017-07-18 15:14:38	2017-07-28	164	84		0	0	1348		2				4	6	10	0.56857	0.515916	59.48		84	62	27	70	90										95	121
1			1		72	68.0685			0	2017-02-06	2017-07-31		0		2017-02-06	158	64		0	0	175						0	4	5	0.612367	0.34102	68.31	69.92	86	76	39	48	111	88	79	41	44	2	4	2	7	-7	119	172
1			1		78	72.1425	2019-02-27	20190227	2	2013-12-02	2017-07-31	01	7	2017-06-20 14:05:09	2017-07-14	158	66		0	0	1337		2				0	4	16	0.63799	0.426387	65.71	64.25	108	93	37	69	116	117	98	41	67	8	6	-2	10	-2	113	124
1			1		76	70.8466		20180215	2	2016-06-21	2017-07-31	01	1	2016-06-21 09:50:47	2016-10-19	164	63		0	0	405		2				0	4	7	0.627659	0.348108	51.34	47.95	55	37	16	22	43	66	41	16	42	19	12	-7	2	95	81	125
1			1		80	72.5644			0	2014-05-01	2017-07-31		3	2016-09-02 10:11:06	2017-07-26	156	59	20	1	0	1187						0	1	8	0.665456	0.525384	51.72	49.65	86	58	21	62	95	93	60	18	68	8	4	-4	-13	10	105	136
1			1		72	64.5863			0	2013-09-30	2017-07-31		1	2008-12-17 14:46:33	2014-11-03	149	49		0	0	1400						0	1	3	0.653192	0.486143	47.94	49.08	78	47	15	31	64	87	54	16	35	11	14	2	5	15	114	164
1			1		79	72.4959		20160917	1	2015-04-07	2016-09-17	01	3	2016-05-07 13:56:16	2016-09-13	162	86		0	0	529		2				2	4	11	0.626349	0.51048	48.23	58.93	69	44	9	37	51	63	48	19	39	-10	10	22	108	7	104	159
1			1		78	71.2274		20160322	1	2014-06-20	2016-03-22	11	2	2015-04-15 12:57:38	2015-06-19	159	55	NA	0	0	641		2				1	0	4	0.637567	0.463788	70.21	70.34	54	49	25	46	63	52	47	25	48	-4	-4	0	-2	4	79	118
1			1		59	51.6904			0	2014-01-23	2017-07-31		0		2015-07-16	165	61		0	0	1285						0	4	2	0.550922	0.519937	55.86	60.11	78	54	17	73	91	78	58	22	76	0	8	8	30	3	101	142
1			1		82	76.5233			0	2016-03-16	2017-07-31		0		2017-07-05	166	90		0	0	502						0	5	4	0.628747	0.376599	68.56	70.17	79	71	56	70	82	79	73	37	83	0	3	2	-34	19	87	107
1			1		63	58.2767			0	2016-04-08	2017-07-31		3	2016-02-18 23:02:18	2017-07-28	156	57		0	0	479						1	6	3	0.608727	0.376136	62.57	68.07	83	65	28	41	93	77	64	30	44	-8	0	9	8	8	97	125
1			1		70	65.3452			0	2016-05-30	2017-07-31		0		2017-06-26	168	54	43	1	0	427						0	4	3	0.570544	0.415395	65.2	61.91	69	57	25	72	81	72	56	22	68	4	-1	-5	-11	-6	100	162
1			1		57	50.611			0	2015-03-04	2017-07-31		0		2017-07-04	169	65		0	0	880						0	4	3	0.520552	0.416478	69.54	69.54	82	71	37	102	90	83	71	37	98	1	1	0	0	-4	93	125
1			1		86	78.7671		20161130	1	2013-12-26	2016-11-30	36	0		2016-07-27	158	49		0	0	1070		2				0	6	4	0.653114	0.369321	46.6	43.52	81	51	16	32	80	92	54	18	33	14	6	-7	15	4	132	195
1			1		70	64.1507			0	2015-11-09	2017-07-31		1	2015-11-06 22:45:22	2016-01-22	161	59		0	0	630						0	4	3	0.608094	0.49215	60.39	62.44	102	78	32	60	98	102	81	32	53	0	3	3	1	-12	102	112
1			1		85	77.7753			0	2014-05-15	2017-07-31		1	2014-05-08 19:31:00	2014-10-21	162	74		0	0	1173						0	1	5	0.646011	0.369326	67.98	68.31	76	69	37	66	92	82	75	37	76	8	8	0	-2	14	95	128
1			1		81	76.8685			0	2017-01-20	2017-07-31		0		2017-05-12	171	63		0	0	192						0	4	4	0.604078	0.306805	42.51	42.91	54	30	12	34	55	55	31	11	33	1	2	1	-9	-3	111	201
1			1		81	75.2411			0	2016-01-07	2017-07-31		0		2017-06-29	167	67	25	0	0	571						0	4	4	0.611648	0.556972	58.68	57.01	84	65	31	44	95	89	67	29	51	6	3	-3	-7	15	112	161
1			1		73	66.5918			0	2015-05-20	2017-07-31		0		2015-06-10	166	67		0	0	803						0	0	5	0.588496	0.432275	76.29	73.6	91	89	63	67	93	93	88	56	76	2	-1	-4	-11	13	87	90
1			1		79	71.0986		20140414	1	2013-09-04	2014-04-14	04	0		2013-10-11	169	53		0	0	222		2				0	1	5	0.577711	0.332949	57.82	54.38	56	42	20	34	10	57	40	15	34	1	-5	-6	-26	-1	87	142
1			1		85	79.5178			0	2016-05-02	2017-07-31		0		2016-05-02	168	52	40	0	0	455						0	0	5	0.611556	0.512525	55.73	60.94	58	43	21	26	51	51	41	24	24	-12	-4	9	11	-9	108	186
1			1		74	69.8027			0	2016-12-16	2017-07-31		3	2016-12-14 15:23:02	2017-07-21	162	54		0	0	227						2	4	3	0.621284	0.534553	66.38	61.89	79	68	33	66	91	77	61	25	59	-3	-10	-7	-25	-10	94	124
1			1		58	50.6219			0	2014-06-06	2017-07-31		2	2016-03-28 18:22:28	2016-04-21 08:57:05	159	53		0	0	1151						2	1	2	0.555385	0.457136	55.12	58.88	55	37	12	34	62	77	55	20	48	39	49	7	60	41	105	205
1			1		70	64.2466		20190331	2	2015-08-13	2017-07-31	18	2	2009-06-30 10:45:57	2017-07-31 19:56:39	161	53		0	0	718		1		not checked		0	4	3	0.634568	0.466873	39.91	41.42	65	33	13	25	55	67	35	14	23	3	7	4	7	-7	82	115
2			1		70	67.9616			0	2018-12-10	2020-07-31		0		2020-07-28	165	70		0	0	599						0	0	11	0.584587	0.508538	68.76	68.9	105	92	50	70	97	107	95	51	86	2	2	0	2	24	111	131
2			1		81	78.0603		20210319	2	2018-01-22	2020-07-31	10	0		2020-07-22	175	71		0	0	921		2				0	4	6	0.608197	0.369727	66.18	67.91	59	52	24	56	64	69	63	33	74	17	20	3	39	32	70	90
2			1		61	57.6658			0	2018-07-04	2020-07-31		0		2020-06-12	172	61		0	0	758						0	0	2	0.501939	0.385775	69.1	69.36	129	111	64	118	100	129	112	64	128	0	0	0	0	9	126	138
2			1		80	78.1151			0	2019-03-15	2020-07-31		0		2020-07-31	151	52		0	0	504						0	4	4	0.697026	0.311237	57.69	52.57	92	71	23	43	101	105	73	21	38	13	3	-9	-8	-13	109	134
2			1		79	76.7425			0	2019-05-06	2020-07-31		1	2019-04-19 17:58:51	2020-07-28	164	70		0	0	452						0	4	7	0.636675	0.509923	68.59	67.97	55	50	22	42	61	59	53	29	31	7	6	-1	29	-26	80	115
2			1		83	81.7151	2021-04-09	20210409	2	2019-09-10	2020-07-31	36	1	2019-08-23 14:55:56	2020-07-23	161	59		0	1	325		2				2	6	8	0.68491	0.485801	39.85	43.29	76	41	16	26	63	97	56	22	36	27	38	9	40	40	98	133
2			1		74	72.9781	2020-09-11	20200911	2	2019-06-14	2020-07-31	18	3	2020-06-07 13:19:51	2020-07-31	169	62	40	0	0	413		1		Pneumonia, COPD AE		3	6	9	0.614009	0.493571	66.58	66.94	52	45	23	35	60	53	46	24	27	2	2	1	5	-22	70	104
2			1		64	60.1315			0	2017-08-21	2020-07-31		2	2018-08-21 17:03:05	2020-07-14	171	85		0	0	1075						0	6	5	0.544679	0.500867	64.68		79	64	35	48	93										101	152
2			1		72	70.4712	2020-10-31	20201031	2	2018-06-06	2020-07-31	01	0		2018-09-25	167	52		0	0	786		2				0	0	4	0.584731	0.39312	61.24	72.12	58	46	21	48	62	37	35	14	39	-35	-24	18	-36	-20	104	181
2			1		70	67.663		20210623	2	2019-06-10	2020-07-31	18	0		2020-07-31	152	59		0	0	417		1		not checked		0	6	3	0.664775	0.506817	48.36	45.91	75	46	14	27	68	92	54	17	27	22	16	-5	16	1	100	136
2			1		72	68.7233			0	2017-11-22	2020-07-31		1	2017-12-05 10:32:59	2020-05-13	167	48		0	1	982						0	4	3	0.584606	0.499644	58.57	62.92	95	72	37	61	89	88	71	40	55	-8	-1	7	8	-11	114	154
2			1		80	76.5096			0	2018-01-23	2020-07-31		2	2019-09-07 19:18:22	2020-07-28	174	67		0	1	920						0	4	5	0.592634	0.426645	62.47	60.12	60	50	36	38	50	61	49	22	30	1	-2	-4	-39	-21	82	123
2			1		69	65.3123			0	2017-08-30	2020-07-31		0		2020-07-30	182	73		0	0	1066						0	0	3	0.499974	0.480117	70.09	71.17	112	101	63	106	99	117	107	68	121	4	6	2	8	14	112	129
2			1		88	87.5973			0	2020-07-23	2020-07-31		1	2019-11-15 17:17:50	2020-07-23	160	49		0	0	8						1	4	5	0.688008	0.294143	42.53	42.55	66	39	14	20	65	70	42	15	30	6	6	0	6	49	119	183
2			1		64	61.2055			0	2019-02-13	2020-07-31		2	2019-02-12 20:46:56	2020-07-27	160	78.3		0	0	534						0	0	5	0.591619	0.571979	70.1		83	73	38	79	83										94	118
2			1		70	68.0795			0	2019-09-18	2020-07-31		2	2019-09-28 14:03:50	2020-07-20	173	61.2		0	0	317						0	0	8	0.545343	0.361667	73.06		66	63	44	54	72										99	163
2			1		79	77.537	2019-08-26	20190826	1	2017-09-04	2019-08-26	01	2	2019-08-05 12:27:15	2019-08-05 12:27:15	163	63		0	0	721		2	Rectal CA i Abscess, Cons↓			0	4	10	0.635973	0.456535	60.94	63.64	80	65	24	51	91	87	74	31	46	8	13	4	27	-9	108	150
2			1		67	65.4548			0	2019-07-01	2020-07-31		0		2019-07-01	168	67		0	0	396						0	0	3	0.569091	0.438324	75.08	71.95	72	69	46	81	70	77	71	41	85	7	3	-4	-11	4	86	116
2			1		70	66.2712			0	2018-01-29	2020-07-31		1	2020-07-01 11:03:40	2020-07-20	162	64	26.7	0	0	914						0	4	3	0.609616	0.425944	69.36	64.12	84	75	43	53	94	83	68	32	46	-1	-9	-8	-25	-13	91	110
2			0		44	40.2301			0	2017-09-26	2020-07-31		1	2019-12-30 11:01:28	2020-05-29	160	39	Y	0	0	1039						0	4	2	0.52526	0.402963	69.8	66.62	77	63	37	42	75	77	59	29	46	-1	-5	-5	-22	9	84	100
2			1		72	70.0411			0	2019-02-15	2020-07-31		4	2019-02-11 09:26:12	2020-07-24	151	43		0	0	532						0	0	5	0.669461	0.418802	46.96	48.67	92	55	18	34	76	102	64	23	32	11	15	4	27	-4	114	146
2			0		70	67.1123			0	2018-03-29	2020-07-31		0		2020-07-01	152	43	80	0	0	855						0	4	3	0.64243	0.508134	51.11	54.73	95	59	17	44	83	107	71	19	53	12	20	7	11	22	119	166
2			1		83	79.5836			0	2018-01-08	2020-07-31		3	2020-04-06 11:17:42	2020-07-29	158	75		0	0	935						0	4	10	0.669521	0.504767	65.3	64.67	78	69	32	54	94	81	70	28	54	3	2	-1	-14	0	99	131
2			1		78	75.9589			0	2019-07-22	2020-07-31		2	2019-07-20 21:04:50	2020-07-28	163	65		0	0	375						1	0	7	0.626534	0.420105	48.26	51	55	35	15	22	56	57	38	16	22	3	9	6	4	-2	114	198
2			1		83	81.7315			0	2020-06-24	2020-07-31		0		2020-07-22	164	71.8		0	0	37						0	0	5	0.649553	0.544362	68.87	66.66	71	66	38	51	56	68	62	30	63	-3	-6	-3	-23	23	82	104
2			0		71	67.874			0	2018-01-24	2020-07-31		2	2019-04-30 10:44:37	2020-06-11	145	49	NA	0	0	919						1	4	4	0.687725	0.462388	54.96	54.88	100	68	20	36	156	105	71	19	42	5	5	0	-5	17	125	173
2			1		85	83.8849	2019-10-30	20191030	1	2018-08-01	2019-10-30	01	12	2019-10-15 13:12:21	2019-10-15 13:12:21	166	71.6		0	0	455		2	Lung CA			5	4	13	0.647349	0.458348	53.4	52.2	52	38	18	24	47	57	41	17	38	10	7	-2	-6	59	99	163
2			1		73	71.0877			0	2019-01-17	2020-07-31		1	2017-10-14 11:07:12	2020-04-13	168	66		0	0	561						0	4	10	0.589773	0.53808	68.52	66.24	65	58	34	44	68	68	59	29	45	5	1	-3	-16	3	91	140
2			1		72	70.2384			0	2019-10-18	2020-07-31		2	2019-10-17 20:48:24	2020-07-16	161	59	40	0	0	287						1	0	6	0.615479	0.433169	73.49	74.24	66	63	41	39	31	70	68	43	40	6	7	1	5	2	72	87
2			1		72	70.1315			0	2019-09-24	2020-07-31		3	2020-07-23 13:27:17	2020-07-31	162	44		0	0	311						1	4	8	0.601399	0.427517	69.68	72.35	68	61	31	64	79	65	61	35	67	-4	-1	4	12	5	106	167
2			1		58	56.1699			0	2019-05-03	2020-07-31		1	2019-04-20 11:03:30	2020-07-01	167	61		1	1	455						1	4	2	0.53499	0.511207	52.84	50.86	54	36	14	31	56	59	37	14	29	8	4	-4	3	-5	110	219
2			1		81	79.411			0	2019-07-19	2020-07-31		2	2019-09-15 13:04:50	2020-06-10	160	55		1	1	378						1	4	5	0.672488	0.508739	62.99	57.08	49	41	20	27	47	54	41	13	32	10	-1	-9	-33	17	72	105
2			1		82	80.074			0	2019-09-30	2020-07-31		1	2017-09-18 19:48:53	2020-07-28	157	59		0	0	305						1	4	6	0.677319	0.549717	66.54	64.56	75	67	28	55	66	74	64	21	64	-1	-4	-3	-27	16	86	104
2			1		51	47.3589			0	2017-08-07	2020-07-31		0		2017-07-31	172	72		0	0	1089						0	0	2	0.477343	0.426423	74.07	81.64	90	81	63	94	78	85	85	79	85	-5	4	10	25	-9	100	133
2			1		55	53.1534			0	2019-02-18	2020-07-31		21	2020-02-05 14:16:31	2020-05-18	168	57		0	0	529						0	6	8	0.535704	0.41318	65.16	69.21	80	65	32	71	72	78	67	37	65	-3	3	6	18	-9	88	113
2			1		56	54.2274			0	2019-06-06	2020-07-31		1	2020-04-03 13:49:23	2020-07-02	170	73		0	0	421						0	4	2	0.52207	0.448617	48	52.74	69	41	14	29	78	72	47	18	42	4	14	10	28	43	118	225
2			1		95	92.0548			0	2018-12-14	2020-07-31		0		2020-02-14	158	53		0	0	595						0	4	5	0.712009	0.444676	59.89	59.59	68	59	22	54	70	64	54	12	70	-7	-8	0	-45	29	99	132
2			1		75	71.3644			0	2017-08-16	2020-07-31		1	2017-08-10 20:11:42	2020-07-23	160	61		0	0	1080						1	6	9	0.635658	0.495108	68.3	70.2	60	53	17	53	57	70	64	31	72	17	20	3	81	36	77	104
2			1		71	70.1452			0	2020-05-04	2020-07-31		1	2019-10-11 12:39:28	2020-07-06	168	65		0	0	88						0	0	4	0.591037	0.457791	67.06	67.81	72	63	42	39	63	69	61	33	41	-4	-3	1	-21	3	87	120
2			1		66	64.1233			0	2019-02-21	2020-07-31		0		2019-02-28	165	74		0	0	526						0	1	3	0.586761	0.381307	70.2	72.32	80	71	46	38	84	81	75	46	41	2	5	3	0	9	88	111
2			1		83	80.2247			0	2018-09-21	2020-07-31		2	2017-12-06 13:28:47	2018-11-16	153	52		0	0	679						0	4	6	0.71117	0.44764	63.11	67.57	92	78	43	34	74	88	80	47	35	-5	2	7	10	4	76	66
2			1		55	52.4685			0	2019-03-15	2020-07-31		0		2020-07-31	171	60		1	1	504						0	4	2	0.52657	0.47381	44.61	43.24	73	40	16	46	76	69	37	14	30	-5	-8	-3	-15	-35	107	190
2			1		93	91.8822			0	2020-07-16	2020-07-31		0		2020-07-16	165	61		0	0	15						0	4	5	0.685271	0.406717	63.48	60.79	96	86	41	67	86	96	82	35	72	0	-4	-4	-16	7	96	107
2			1		82	79.7068		20200316	1	2019-04-25	2020-03-16	11	1	2017-10-04 02:29:19	2020-01-30	160	81		0	0	326		2				0	4	9	0.631661	0.517628	53.59	57.36	51	37	14	25	57	51	39	14	26	0	7	7	6	5	131	231
2			1		79	77.3945			0	2020-03-20	2020-07-31		0		2020-06-12	164	65		0	1	133						0	4	7	0.636464	0.414044	70.2	69.34	95	88	53	61	132	80	73	40	47	-16	-17	-1	-24	-23	108	137
2			1		74	70.937			0	2018-04-23	2020-07-31		0		2020-06-12	159	52		0	0	830						0	4	5	0.62346	0.462585	63.25	63.79	91	74	34	59	88	85	70	35	53	-6	-6	1	5	-10	112	149
2			1		76	74.6301			0	2020-07-24	2020-07-31		4	2020-07-08 13:06:41	2020-07-28	168	66		0	0	7						0	0	6	0.606436	0.512364	54.97	53.45	65	47	20	36	57	68	48	19	45	5	2	-3	-4	24	99	156
2			1		73	68.8329			0	2017-10-09	2020-07-31		2	2018-04-20 16:01:05	2020-07-31	175	80		0	0	1026						0	4	5	0.556373	0.483158	64.52	62.94	59	49	25	50	70	60	49	23	48	2	-1	-2	-9	-4	92	156
2			1		74	71.3041			0	2018-05-16	2020-07-31		4	2020-07-13 11:24:11	2020-07-29	165	90		0	0	807						0	0	10	0.612654	0.393449	70.86		79	73	40	63	86										88	106
2			1		55	53.6356			0	2020-01-20	2020-07-31		4	2019-11-28 09:43:26	2020-07-23	172	81		0	0	193						0	0	4	0.531485	0.337768	57.32	68.98	89	63	23	73	105	84	72	38	81	-6	14	20	67	10	102	141
2			1		69	66.9699			0	2019-02-13	2020-07-31		0		2020-07-29	160	60		0	0	534						0	0	3	0.611445	0.437953	63.23	64.61	110	89	41	85	104	102	84	43	82	-7	-5	2	6	-3	112	125
2			1		62	61.4356			0	2020-07-31	2020-07-31		3	2020-01-16 10:18:27	2020-07-31	166	65	40	0	0	0						0	1	7	0.504182	0.398784	73.13	73.24	98	90	59	64	30	96	88	57	67	-2	-2	0	-3	5	126	185
2			1		68	64.5233			0	2018-03-16	2020-07-31		2	2018-09-25 22:30:05	2020-07-13	168	90		0	0	868						2	2	5	0.584353	0.374737	70.09	71.06	65	58	34	50	77	63	57	30	44	-3	-2	1	-10	-12	77	103
2			1		62	59.1726			0	2019-01-24	2020-07-31		1	2018-07-04 19:43:37	2020-07-16	169	71		0	0	554						0	4	3	0.534571	0.377909	61.17	67.1	105	81	35	82	125	112	94	50	86	6	17	10	43	5	133	197
2			1		69	65.7288			0	2018-04-19	2020-07-31		3	2019-10-21 12:25:00	2020-07-30	160	64		0	0	834						0	6	7	0.612049	0.461768	57.72	54.83	83	61	22	52	99	83	58	18	59	0	-5	-5	-21	14	111	161
2			1		62	59.7014			0	2019-06-14	2020-07-31		1	2019-06-05 17:09:15	2020-07-24	170	71	40	0	0	413						0	0	2	0.54685	0.363177	70.17	71.96	96	85	45	88	101	100	90	52	95	4	6	3	16	7	99	116
2			1		54	51.9918			0	2019-10-28	2020-07-31		2	2020-05-13 11:00:45	2020-07-24	161	76		0	0	277						0	4	3	0.573383	0.443322	66.85	65.41	53	43	19	61	62	56	45	18	69	5	3	-2	-9	15	71	108
2			1		81	79.4986			0	2019-09-18	2020-07-31		6	2020-03-23 11:07:34	2020-07-09	173	74	Y	0	1	317						6	4	4	0.610993	0.419948	48.86	46.21	84	55	23	45	65	80	49	22	43	-5	-10	-5	-4	-3	101	138
2			1		68	64.2438			0	2018-02-01	2020-07-31		2	2019-07-22 12:35:02	2020-07-15	170	65		0	0	911						1	4	5	0.580328	0.530603	38.32	38.62	61	30	13	17	54	61	30	13	20	0	1	1	-2	15	98	169
2			1		71	68.4603			0	2018-12-27	2020-07-31		0		2020-07-20	172	66		0	0	582						0	4	4	0.56633	0.38623	72.01	71.39	104	97	67	73	74	100	92	60	71	-4	-5	-1	-10	-3	87	73
2			1		74	70.4548			0	2018-03-30	2020-07-31		0		2020-07-24	172	72		1	0	854						0	4	4	0.564983	0.461739	47.31	46.97	71	44	18	42	65	73	44	17	47	2	2	-1	-6	11	120	207
2			1		86	83.2575			0	2018-06-13	2020-07-31		5	2020-04-20 09:39:46	2020-07-23	163	69		0	0	779						3	0	9	0.644376	0.555594	65.16	61.34	53	47	25	33	64	57	48	22	34	7	1	-6	-11	3	106	174
2			1		74	71.4356			0	2019-03-13	2020-07-31		1	2019-03-15 14:00:00	2020-07-07	160	80	Y	1	1	506						1	6	4	0.617589	0.481649	54.48	52.69	49	35	12	18	54	53	36	14	20	9	6	-3	23	8	112	200
2			1		68	64.6521			0	2018-03-02	2020-07-31		2	2018-01-18 11:10:28	2020-07-22	156	58		1	1	882						0	4	3	0.638301	0.437152	57.4	56.56	92	67	25	45	93	94	67	24	45	2	0	-1	0	-1	96	109
2			1		89	85.2904			0	2018-02-26	2020-07-31		0		2020-07-13	160	61		0	0	886						0	5	5	0.683562	0.429865	64.09	64.02	89	79	36	62	104	92	81	37	70	3	3	0	2	12	101	123
2			1		53	50.9041			0	2019-08-22	2020-07-31		0		2020-01-21	165	70		0	0	344						0	0	3	0.529392	0.396337	75.39	77.84	76	70	45	89	84	75	72	51	87	-1	2	3	13	-2	93	133
2			1		70	66.3973			0	2017-11-21	2020-07-31		0		2020-07-28	162	66		0	0	983						0	6	6	0.617352	0.43143	74.55	71.37	74	70	44	81	89	73	66	28	86	-2	-6	-4	-37	6	75	84
2			1		71	68.7342			0	2018-11-13	2020-07-31		1	2018-11-13 19:41:16	2019-05-02	174	60	30	0	0	626						0	4	5	0.571881	0.43348	50.75	50.11	96	63	25	45	88	99	64	25	46	4	3	-1	-1	1	105	136
2			1		67	64.5534			0	2019-05-09	2020-07-31		1	2017-10-25 10:56:28	2020-07-16	172	62		0	0	449						0	4	4	0.528241	0.352494	72.29	70.44	114	105	64	136	108	115	104	53	130	1	-2	-3	-16	-4	125	159
2			1		73	71.2274		20200904	2	2019-03-12	2020-07-31	36	0		2020-07-28	170	93		0	0	507		2				0	4	4	0.599527	0.432482	56.91	59.83	65	49	19	56	72	67	53	22	65	3	9	5	17	15	90	132
2			1		77	75.1973	2020-07-12	20200712	1	2018-06-04	2020-07-12	01	1	2020-07-08 21:59:58	2020-07-22	157	53		0	0	769		2	HCC(II)			0	4	9	0.674301	0.442671	64.09	63.77	87	74	29	66	94	85	71	24	70	-3	-3	-1	-16	6	84	89
2			1		76	72.3178			0	2017-08-02	2020-07-31		0		2020-07-17	144	54.5		0	0	1094						0	4	5	0.709287	0.480313	73.66	70.67	71	67	30	59	94	77	70	27	57	9	5	-4	-9	-3	82	93
2			1		67	63.8329	2020-03-07	20200307	1	2017-08-16	2020-03-07	18	6	2020-02-03 21:45:00	2020-02-03 21:45:00	141	33		0	0	934		1	COPD AE, Pneumonia	Pneumonia, COPD AE		6	4	4	0.695672	0.566598	37.74	39.78	82	38	13	14	97	82	40	12	18	1	6	5	-5	36	131	186
2			1		75	72.2685			0	2019-01-28	2020-07-31		1	2018-05-15 21:38:10	2019-05-20	160	61		0	0	550						0	0	6	0.638553	0.367469	63.45	65.19	94	78	39	46	101	98	84	40	53	5	7	3	4	17	101	120
2			1		74	72.5123	2021-02-17	20210217	2	2020-02-13	2020-07-31	12	6	2020-01-15 09:36:18	2020-07-30	169	62	80	0	0	169		2				0	0	10	0.588664	0.478281	71.57	70.04	70	66	40	77	87	72	66	35	79	2	0	-2	-12	3	98	149
2			1		73	71.5781			0	2019-11-18	2020-07-31		0		2020-07-18	170	60		0	0	256						0	4	4	0.586574	0.416787	74.59	74.7	72	70	48	87	60	72	70	47	85	-1	0	0	-2	-3	78	96
2			1		67	65.8712			0	2020-01-20	2020-07-31		2	2020-03-30 18:46:00	2020-05-27	167	55		0	0	193						0	0	5	0.581477	0.504196	60.72	64.97	68	53	25	44	76	70	58	31	56	2	9	7	25	28	99	156
2			1		71	67.6438			0	2017-10-24	2020-07-31		0		2018-06-22	158	60		0	0	1011						0	4	3	0.612662	0.350329	71.48	70.51	98	89	51	72	103	100	90	48	64	3	1	-1	-6	-12	111	138
2			1		78	76.4548			0	2019-10-14	2020-07-31		0		2020-06-22	160	74	40	0	0	291						0	0	8	0.656722	0.394706	65.89	65.35	79	68	33	62	67	79	68	29	61	1	0	-1	-12	-2	81	93
2			1		60	57.7342			0	2018-12-10	2020-07-31		0		2020-07-27	165	70		0	0	599						0	0	6	0.559786	0.495063	59.25	60.26	54	40	18	36	54	55	42	17	33	3	5	2	-6	-9	92	165
2			1		59	56			0	2018-06-08	2020-07-31		3	2018-08-26 19:46:05	2020-05-21	161	75		0	0	784						1	4	4	0.550728	0.346786	74.78	74.98	100	92	56	105	95	107	99	58	117	7	7	0	3	11	111	141
2			1		61	58.2438			0	2018-05-03	2020-07-31		0		2020-02-03	170	78		0	0	820						0	6	2	0.539921	0.394296	55.32	52.12	74	51	21	43	74	77	50	19	44	4	-2	-6	-10	1	105	170
2			0		86	83.8932	2019-10-02	20191002	1	2017-10-30	2019-10-02	01	3	2019-09-02 13:44:12	2019-09-02 13:44:12	155	59	NA	0	0	702		2	Lung CA			0	5	14	0.691839	0.526499	70.74	68.1	74	66	33	54	86	77	66	27	54	3	-1	-4	-19	-1	91	125
2			1		64	60.463			0	2018-01-16	2020-07-31		0		2020-05-01	161	64		1	0	927						0	0	3	0.589985	0.371089	55.17		96	67	26	54	115										120	168
2			1		67	63.326			0	2017-10-02	2020-07-31		1	2018-04-27 11:32:01	2019-04-08	168	69		0	0	1033						0	4	4	0.568879	0.449499	65.79	64.25	66	55	31	35	75	70	58	32	33	6	4	-2	2	-7	91	142
2			1		65	61.1589			0	2017-08-09	2020-07-31		1	2017-08-08 15:28:36	2017-08-22	164	69		0	0	1087						1	4	8	0.580032	0.436424	62.57	63.97	67	53	26	44	74	71	58	25	54	7	9	2	-4	23	94	145
2			1		62	60.4658			0	2020-03-10	2020-07-31		7	2020-02-24 10:33:27	2020-07-08	164	46		0	0	143						1	6	7	0.590155	0.405802	68.53	72.16	79	68	42	63	70	76	69	38	50	-4	1	5	-10	-20	73	71
2			1		75	72.2027			0	2018-07-05	2020-07-31		15	2020-06-18 10:08:47	2020-06-30	163	55		0	0	757						1	0	5	0.605875	0.562522	43.07	43	57	32	12	19	84	59	33	11	24	3	3	0	-3	27	139	259
2			1		65	61.8384			0	2018-07-12	2020-07-31		0		2020-07-29	156	72	40	0	0	750						0	6	3	0.619002	0.435435	69.19	69.02	74	64	29	64	78	81	70	34	60	10	9	0	15	-6	85	107
2			0		69	65.5507			0	2017-11-07	2020-07-31		2	2018-01-03 12:53:38	2020-07-06	139	54	NA	0	0	997						0	0	6	0.692569	0.464156	70.71		95	83	29	45	126										106	136
2			1		58	53.9562			0	2017-10-02	2020-07-31		0		2017-10-02	170	56		0	0	1033	DOE *3month, lost to follow up					0	4	2	0.503484	0.561261	37.79	37.97	49	23	10	30	57	52	24	10	25	5	6	0	2	-15	136	315
2			1		66	63.6411			0	2019-02-13	2020-07-31		1	2017-10-14 19:58:28	2020-07-01	152	60		0	0	534						0	6	4	0.622798	0.463551	73.81	71.22	69	63	37	39	75	74	66	32	38	8	4	-3	-14	-2	99	144
2			1		84	80.6548		20190806	1	2018-04-17	2019-08-06	36	0		2018-05-22	153	44	15	0	0	476		2				0	4	5	0.696906	0.533638	55.59	55.24	87	65	29	26	101	84	63	28	28	-3	-4	-1	-4	6	112	144
2			1		76	73.5425			0	2019-04-29	2020-07-31		1	2017-12-01 08:10:09	2019-12-26	164	76		0	0	459						0	4	4	0.617324	0.504459	55.58	54.06	68	50	20	29	49	69	49	20	27	0	-2	-3	-4	-9	98	148
2			1		56	54.8959	2019-08-11	20190811	1	2018-05-21	2019-08-11	01	10	2019-07-12 17:20:00	2019-08-21	154	65		0	0	447		2	Sepsis, Psoriasis i inf of skin			0	1	13	0.59723	0.448182	66.62	68.67	67	55	18	31	42	62	52	23	31	-8	-5	3	31	0	79	92
2			1		73	69.4384		20190426	1	2017-12-12	2019-04-26	01	0		2017-12-12	157	46		0	0	500		2			CXR seems OK even though having lung cancer; cause of death, unknown	0	4	5	0.626731	0.415239	63.48	64.76	103	84	35	78	87	97	81	36	66	-6	-4	2	2	-16	111	131
2			1		64	60.2658			0	2017-12-13	2020-07-31		0		2018-02-14	174	80	Y	0	0	961						0	4	3	0.529179	0.346524	67.08	66.31	93	79	43	65	95	97	81	39	82	4	2	-1	-10	26	102	132
2			1		65	61.5096			0	2018-02-09	2020-07-31		1	2018-02-04 01:09:38	2019-03-25	170	54.8	Y	0	1	903						1	6	3	0.581867	0.519563	37.92	45.72	67	32	15	27	60	59	34	15	26	-12	6	21	-2	-4	91	142
2			1		71	68.1452			0	2018-09-20	2020-07-31		3	2019-06-09 17:53:12	2020-07-29	162	68		0	0	680						2	6	4	0.631996	0.477304	54.63	54.1	67	47	19	38	69	71	49	19	34	5	4	-1	0	-11	83	113
2			1		72	69.3781			0	2018-06-04	2020-07-31		1	2018-04-22 15:16:01	2020-06-08	167	60		0	0	788						0	4	4	0.612814	0.433877	62.48	62.62	63	51	24	46	60	65	53	26	47	4	5	0	7	3	72	93
2			1		75	71.8027			0	2018-07-06	2020-07-31		3	2018-12-14 14:20:54	2020-01-14	155	55		0	0	756						0	6	9	0.653654	0.446176	57.46	59.69	77	57	20	49	59	80	62	20	57	4	8	4	1	16	98	131
2			1		82	80.1178	2020-12-07	20201207	2	2018-05-21	2020-07-31	18	2	2018-05-27 16:30:58	2020-06-30	157	51		0	0	802		1		no in-patient electrical record		0	1	7	0.688113	0.489147	62.94		86	73	26	67	107										94	107
2			1		63	60.5205			0	2018-07-09	2020-07-31		20	2020-07-13 18:07:58	2020-07-13 18:07:58	161	64		0	0	753						0	5	10	0.57683	0.457809	56.35	57.61	93	65	27	58	103	101	73	29	64	9	11	2	7	12	127	192
2			1		86	83.6164			0	2019-03-04	2020-07-31		1	2018-07-13 21:20:02	2020-07-20	150	54	100	0	0	515						0	4	6	0.729219	0.443249	68.44	65.14	117	110	54	50	131	117	105	47	39	0	-5	-5	-13	-22	94	82
2			1		69	66.3014			0	2018-07-26	2020-07-31		0		2018-07-26	165.5	70.5		0	0	736						0	0	3	0.566111	0.450479	64.33	41.18	92	71	36	42	84	74	37	15	18	-19	-48	-36	-59	-58	118	173
2			1		76	73.4219			0	2018-09-06	2020-07-31		2	2019-08-31 19:04:59	2020-07-27	155	63		0	0	694						1	6	7	0.65132	0.466956	64.56	61.88	65	55	26	29	54	72	58	21	47	11	6	-4	-19	62	95	137
2			1		65	64.0384			0	2020-06-30	2020-07-31		2	2020-03-24 11:27:36	2020-06-30	162	81	2.5	0	0	31						1	4	5	0.592792	0.466574	70.12	70.52	52	46	25	35	54	56	50	27	40	8	9	1	10	13	82	133
2			1		55	53.0795			0	2019-03-21	2020-07-31		2	2019-07-26 19:47:04	2020-07-17	160	50		1	1	498						2	6	3	0.576685	0.412565	58.17	59.41	85	61	25	54	94	88	64	26	61	3	6	2	4	12	100	134
2			1		63	61.6247	2020-12-09	20201209	2	2018-10-25	2020-07-31	01	19	2020-07-15 12:44:33	2020-07-15 12:44:33	172	62		0	0	645		2				0	0	10	0.523076	0.498556	70.77	62.39	63	57	36	49	60	60	47	27	35	-6	-17	-12	-26	-29	100	175
2			1		67	64.1945			0	2018-11-01	2020-07-31		1	2018-11-02 13:36:56	2019-04-22	154	61.8		0	0	638						1	4	3	0.633872	0.525996	44.19	41.95	65	36	12	20	34	71	38	12	35	10	4	-5	-3	73	102	157
2			1		68	66.6055			0	2020-02-06	2020-07-31		2	2020-02-04 19:11:43	2020-06-09	170	61.8		0	0	176						1	0	6	0.55324	0.439926	59.96	57.08	81	63	21	54	87	82	60	28	48	1	-4	-5	31	-11	121	182
2			1		82	79.5096		20201019	2	2018-12-03	2020-07-31	11	1	2018-11-19 13:05:35	2020-07-07	165	58		0	0	606		2				1	4	4	0.640858	0.558545	60.99	66.17	54	44	21	21	82	44	39		23	-18	-11	8		10	99	159
2			1		65	62.9014			0	2019-02-22	2020-07-31		3	2019-04-10 19:35:24	2019-05-20	163	72		1	0	525						2	4	4	0.58694	0.475953	64.47	67.12	65	53	26	51	68	65	55	28	50	0	4	4	10	-3	92	142
2			1		64	61.2521		20200809	2	2018-12-31	2020-07-31	01	0		2019-12-14 11:18:14	164	54		0	0	578		2				0	4	5	0.571679	0.334042	68.29	67.34	117	101	51	103	116	119	101	47	94	1	0	-1	-8	-9	113	119
2			1		60	59.8849	2019-03-11	20190311	1	2019-03-08	2019-03-11	01	2	2019-03-10 19:17:17	2019-03-10 19:17:17	163	50		0	0	3		2	Lung CA, Esophageal ca, fistula freeing			0	4	4	0.549458	0.466487	74.29	72.89	82	76	49	68	93	82	75	45	64	0	-2	-2	-8	-5	117	185
2			1		70	67.9452			0	2019-03-18	2020-07-31		1	2019-03-18 11:28:58	2019-10-14	159	65		0	0	501						0	6	5	0.618198	0.4075	73.25		78	73	45	52	91										95	125
2			1		67	65.1507			0	2020-01-02	2020-07-31		1	2019-04-02 13:50:39	2020-03-05	159	75		0	0	211						0	0	4	0.608189	0.380661	73.3		86	80	39	61	98										98	117
2			1		85	85.0877	2019-11-28	20191128	1	2019-04-23	2019-11-28	01	4	2019-10-05 10:26:30	2020-03-02	171	53		0	0	219		2	Bf1, Cholangio ca			0	2	11	0.619814	0.533505	56.38		55	43	24	35	46										104	172
2			1		59	56.6301			0	2019-05-14	2020-07-31		1	2019-05-13 14:50:31	2019-06-10	170	68		0	0	444						1	0	3	0.544093	0.475925	46.73		79	46	18	57	73										105	165
2			0		70	67.8356			0	2019-06-14	2020-07-31		0		2020-07-17	159	63	NA	1	0	413						0	4	3	0.621915	0.453905	64.77	64.55	104	81	31	87	106	102	79	28	85	-2	-2	0	-9	-3	104	123
2			1		60	57.8438			0	2019-05-29	2020-07-31		0		2020-07-10	178	70		1	1	429						0	4	2	0.515623	0.335189	59.35	58.73	95	71	34	84	80	95	70	33	79	0	-1	-1	-4	-7	93	104
2			1		63	61.2384			0	2019-06-24	2020-07-31		0		2019-07-22	170	68		0	0	403						0	0	3	0.57898	0.379897	58.56	60.21	78	58	26	52	75	78	60	27	58	0	3	3	2	10	75	81
2			0		89	86.8548			0	2019-07-25	2020-07-31		1	2019-07-22 19:20:53	2019-08-07	152	52	NA	0	0	372						0	0	8	0.719672	0.469969	72.38	72.42	98	91	41	59	91	96	89	42	43	-2	-2	0	3	-27	84	94
2			1		83	81.0356			0	2019-08-30	2020-07-31		1	2019-08-29 19:13:35	2019-09-05	154	59		0	0	336						0	0	7	0.709463	0.445918	62.07		76	64	17	48	97										85	92
2			0		65	63.726			0	2020-03-26	2020-07-31		16	2020-07-30 11:33:38	2020-07-30 11:33:38	163	62	Y	0	0	127						0	4	9	0.589217	0.460186	71.52	68.23	81	69	40	60	73	86	70	34	67	6	1	-5	-15	13	85	104
2			1		68	66.4849			0	2019-09-30	2020-07-31		0		2019-09-30	171	61	Y	0	0	305						0	0	3	0.534986	0.404299	60.46		98	76	34	69	81										130	199
2			1		80	79.9425	2020-01-31	20200131	1	2019-12-13	2020-01-31	01	3	2020-01-08 19:37:55	2020-01-31	159	42		0	0	49		2	Chemotherapy complicetn's, Lung CA	Chemotherapy complicetn's, Lung CA	OPD f/u, 2020/1/30 C/T後 2wk內死亡,死因不明	0	0	11	0.656551	0.499266	69.38	71.64	87	81	44	74	77	86	83	52	51	-1	3	3	17	-31	98	120
2			1		69	67.4904			0	2020-02-13	2020-07-31		0		2020-07-30	166	62	50	0	0	169						0	4	3	0.596022	0.387414	68.56	68.12	95	84	56	47	98	94	83	51	51	0	-1	-1	-9	9	94	104
2			1		61	60.1781			0	2020-02-21	2020-07-31		0		2020-07-10	168	80		0	1	161						0	4	3	0.552863	0.265064	70.66	71.71	113	101	59	124	122	116	105	59	128	3	4	1	0	3	111	121
2			1		71	69.8877			0	2020-07-07	2020-07-31		2	2020-06-02 12:42:21	2020-07-21	169	87		0	0	24						0	0	4	0.585625	0.411389	70.59	70.82	71	65	41	41	77	70	65	40	38	-1	-1	0	-2	-9	89	126
2			1		57	55.2493			0	2019-05-02	2020-07-31		1	2019-04-22 14:52:24	2020-07-28	175	55	25	0	0	456						0	4	2	0.494734	0.532579	44.71	42.22	64	36	14	29	57	71	37	14	28	11	5	-6	4	-4	120	242
2			1		61	57.2575		20190119	1	2017-12-11	2019-01-19	01	0		2018-02-14	176	60		1	0	404		2				0	4	2	0.52639	0.39454	53.31	54.75	92	62	29	40	89	92	64	29	55	0	3	3	1	36	99	127
2			1		66	65.7041	2019-03-22	20190322	1	2018-12-25	2019-03-22	01	2	2019-03-11 20:20:05	2019-03-20	172	79		0	0	87		2	CAD, Lung CA			0	4	10	0.563049	0.438027	70.38	72.88	63	57	34	39	64	66	62	39	54	5	9	4	14	38	78	112
2			1		78	75.4301			0	2020-07-02	2020-07-31		2	2019-06-05 10:05:33	2020-07-27	158	74	Y	0	0	29						1	4	5	0.637847	0.524422	53.56	52.49	61	43	16	38	8	65	45	15	38	7	5	-2	-11	2	99	152
2			1		79	76.6027			0	2019-03-07	2020-07-31		3	2020-07-15 14:48:44	2020-07-23	165	63		0	0	512						1	4	4	0.61981	0.538544	35.81	38.65	63	30	12	22	36	60	31	14	27	-5	2	8	14	18	121	206
2			0		56	54.5671			0	2019-08-22	2020-07-31		2	2019-08-20 01:03:10	2020-07-22	153	65.5	NA	0	0	344						0	4	4	0.614726	0.471676	54.27	56.21	66	43	14	35	65	72	48	16	32	8	12	4	12	-8	88	132
2			1		82	80.8356			0	2020-06-08	2020-07-31		0		2020-07-16	158	72		0	0	53						0	0	8	0.659545	0.390842	73.87	73.39	95	95	59	72	92	96	95	56	69	1	1	-1	-6	-4	103	121
2			1		80	76.1644			0	2017-12-12	2020-07-31		2	2020-02-11 14:41:48	2020-07-24	170	53		0	0	962						1	6	8	0.640495	0.444482	42.86	36.71	83	47	22	30	78	76	37	14	32	-8	-21	-14	-34	5	86	103
2			1		83	79.6			0	2018-01-16	2020-07-31		2	2019-04-17 09:44:28	2020-07-01	165	101		0	0	927						0	4	6	0.64483	0.398584	68.23	70.04	61	56	30	58	73	65	61	34	64	6	9	3	11	11	82	117
2			1		69	67.0795	2020-02-15	20200215	1	2018-04-24	2020-02-15	01	4	2019-07-26 16:24:28	2020-01-22	163	69	40	0	0	662		2	Lung CA			0	4	11	0.60201	0.421673	72.68	68.49	77	72	47	47	84	75	66	33	47	-3	-8	-6	-30	-2	88	113
2			1		88	86.5726			0	2019-11-25	2020-07-31		0		2020-07-27	163	76		0	0	249						0	2	10	0.684204	0.395187	69.17	69.84	87	82	45	60	90	87	83	45	63	0	1	1	0	5	81	85
2			1		49	47.7315			0	2019-12-31	2020-07-31		0		2020-04-28	176	59	Y	0	0	213						0	0	3	0.485325	0.440585	64.75	70.19	64	51	28	34	61	61	53	31	39	-4	4	8	11	15	80	127
2			1		72	69.6795			0	2019-03-25	2020-07-31		0		2020-07-07	170	65		0	0	494						0	4	3	0.58549	0.444588	63.43	64.12	67	55	29	34	68	69	57	26	33	3	4	1	-11	-4	89	133
2			1		78	74.6301			0	2018-06-04	2020-07-31		0		2018-06-11	161	62		0	0	788						0	4	4	0.643733	0.522747	42.69	42.12	66	37	14	30	65	72	40	15	29	9	8	-1	7	-2	112	178
2			1		79	76.274			0	2018-04-25	2020-07-31		1	2017-12-04 13:32:38	2019-05-22	156	43		0	0	828						0	0	5	0.663313	0.485535	71.27	73.41	84	79	44	62	74	84	81	47	53	0	3	3	6	-14	87	99
2			1		57	54.0329			0	2018-06-19	2020-07-31		22	2020-02-06 14:25:44	2020-07-14	155	51		1	0	773						0	4	10	0.584535	0.418687	62.26	61.3	104	79	29	74	91	103	77	25	70	-1	-2	-2	-11	-5	111	129
2			1		81	79.1589		20201212	2	2019-04-26	2020-07-31	36	1	2019-06-19 10:17:58	2020-07-30	161	71		0	0	462		2				0	4	4	0.641566	0.426584	75.81	76.51	79	80	47	96	36	80	82	56	78	2	3	1	18	-19	78	83
2			1		92	88.9671			0	2018-03-28	2020-07-31		4	2019-12-19 21:07:58	2020-01-21	162	45	10	0	0	856						1	4	5	0.681563	0.458594	71.03	72.18	85	85	51	52	89	89	90	58	72	4	6	2	13	39	94	113
2			1		80	79.2			0	2020-03-12	2020-07-31		0		2020-07-07	163	71		0	1	141						0	4	6	0.648644	0.401463	67.5	69.29	77	69	60	41	87	77	70	37	69	-1	2	3	-38	70	92	119
2			1		79	77.0356			0	2019-12-05	2020-07-31		0		2020-05-28	168	61	30	0	0	239						0	5	4	0.615945	0.49489	47.22	46.3	70	43	18	35	62	65	40	16	26	-7	-8	-2	-10	-26	110	177
2			1		79	78.0685			0	2020-03-30	2020-07-31		2	2019-12-19 14:06:33	2020-06-23	165	85	50	0	0	123						2	0	4	0.641105	0.367327	70.07	70.84	77	72	39	61	78	77	73	41	64	1	2	1	3	4	80	94
2			1		72	71.2877			0	2020-05-25	2020-07-31		0		2020-07-13	169	70		0	0	67						0	4	4	0.582424	0.402064	58.23	65.76	82	62	27	67	68	79	67	34	66	-3	10	13	26	-1	107	158
2			1		75	73.2822			0	2019-07-08	2020-07-31		1	2019-06-29 21:24:28	2020-07-27	174	70		0	0	389						0	0	4	0.583775	0.451186	60.78	60.08	77	61	29	58	69	82	65	29	55	6	5	-1	1	-5	89	120
2			1		90	86.1068			0	2017-09-25	2020-07-31		1	2017-09-15 14:23:21	2020-07-22	164	63	55	0	1	1040						0	4	5	0.673796	0.455125	65.49	68.66	71	64	35	47	72	67	64	36	53	-5	0	5	1	12	83	107
2			1		84	84.189	2019-06-27	20190627	1	2019-03-11	2019-06-27	01	3	2019-06-10 12:52:53	2019-07-05	160	47.7		0	0	108		2	Lung CA		Lung ca	0	0	11	0.682193	0.484775	69.44	68.93	86	82	44	55	110	90	85	42	75	5	4	-1	-5	38	95	114
2			1		90	87.3452			0	2019-02-11	2020-07-31		0		2019-05-13	155	51		0	0	536						0	4	6	0.711341	0.465505	51.81	52.27	107	78	32	35	104	104	77	31	37	-3	-2	1	-4	6	118	140
2			1		56	54.3616			0	2020-01-21	2020-07-31		0		2020-07-28	168	83		0	0	192						0	0	3	0.518431	0.374563	74		87	80	51	72	97										110	164
2			1		90	88.926			0	2020-06-16	2020-07-31		1	2019-05-11 12:51:00	2020-06-16	163	61	35	0	0	45						0	4	6	0.68895	0.493407	54.94	54.93	73	56	25	26	66	80	61	23	38	10	10	0	-10	43	94	127
2			1		70	66.9479			0	2018-08-24	2020-07-31		8	2020-02-13 09:32:40	2020-07-27	153	50		0	0	707						4	6	9	0.671881	0.426243	49.6	51.44	92	58	20	37	86	96	63	22	35	4	8	4	10	-5	90	91
2			1		61	57.9425			0	2018-10-30	2020-07-31		0		2020-05-28	170	78		0	0	640						0	4	3	0.555803	0.358476	67.47	68.54	79	67	38	60	79	80	69	39	62	1	3	2	2	3	78	86
2			1		74	71.4521			0	2019-03-21	2020-07-31		1	2017-12-21 11:46:14	2020-07-09	162	78		0	0	498						0	0	5	0.60707	0.475445	62.84	56.1	64	53	24	39	72	65	47	19	29	1	-10	-11	-20	-27	110	181
2			1		56	53.9863			0	2019-04-18	2020-07-31		0		2020-06-05	176	59.6		0	1	470						0	0	3	0.508007	0.346665	59.76	57.12	105	79	35	92	116	101	72	32	86	-4	-8	-4	-8	-7	112	141
2			1		73	70.5616		20210331	2	2018-08-24	2020-07-31	18	1	2019-08-07 18:50:45	2020-07-16	165	65		0	1	707		1		not checked		0	6	6	0.608424	0.396514	61	68.73	88	70	29	84	78	86	77	39	62	-2	10	13	31	-26	98	122
2			1		64	62.6055			0	2020-06-18	2020-07-31		1	2019-01-24 12:48:10	2020-06-24	168	75		0	0	43						1	0	4	0.563269	0.370764	72.47	74.02	82	75	46	96	80	87	82	51	115	6	9	2	11	19	89	110
2			1		78	74.0904			0	2017-11-06	2020-07-31		5	2019-10-16 14:53:36	2020-07-13	160	74		0	0	998						1	5	8	0.644942	0.444433	68.18	70.04	76	68	38	53	80	73	68	34	60	-3	0	3	-11	14	87	109
2			1		71	70.3562			0	2020-06-17	2020-07-31		2	2020-06-16 14:20:29	2020-07-02	161	76	Y	0	0	44						0	0	6	0.61926	0.438114	63.76	65.75	76	63	30	41	93	76	65	31	50	0	3	3	2	23	106	155
2			1		80	77.6466			0	2019-04-12	2020-07-31		1	2019-05-11 19:37:37	2020-07-20	162	62		0	0	476						1	2	4	0.652455	0.517419	48.84	44.91	58	38	16	27	51	61	37	13	32	5	-3	-8	-15	19	96	148
2			1		72	68.8822			0	2018-02-06	2020-07-31		1	2018-01-23 14:43:42	2018-02-21	160	68.5		0	0	906						0	4	4	0.621475	0.531516	61.52	62.04	54	43	18	35	20	56	45	19	36	4	5	1	7	4	76	112
2			1		62	61.3945	2018-07-23	20180723	1	2017-12-20	2018-07-23	01	12	2018-07-15 16:29:48	2018-08-10	165	41	Y	0	0	215		2	Tongue CA			0	4	14	0.562392	0.465502	65.93	69.02	79	66	40	32	81	57	50	25	29	-28	-24	5	-38	-11	106	161
2			1		62	60.2466			0	2019-12-11	2020-07-31		0		2020-06-04	171	62		0	0	233						0	0	3	0.542507	0.337838	65.4	64.35	115	95	48	85	95	120	98	48	75	4	2	-2	1	-12	103	97
2			1		88	85.211	2020-11-01	20201101	2	2017-09-14	2020-07-31	18	1	2017-08-01 19:14:55	2020-07-20	160	60		0	0	1051		1		not checked		1	4	7	0.65369	0.50638	43.69	47.71	84	51	23	29	74	81	53	23	33	-4	5	9	1	12	148	227
2			1		83	82.1507		20210328	2	2020-05-14	2020-07-31	01	0		2020-07-11 21:12:21	166	65		0	0	78		2				0	0	11	0.64729	0.467624	49.32	48.84	74	49	21	37	77	78	52	21	41	6	5	-1	0	11	109	162
2			1		72	68.6712			0	2017-08-21	2020-07-31		0		2020-06-02	160	71		0	0	1075						0	4	3	0.602292	0.422048	65.46	64.84	67	57	30	32	64	67	56	25	32	-1	-2	-1	-17	-1	108	171
2			1		75	72.8521			0	2019-07-15	2020-07-31		0		2020-07-27	167	69		1	1	382						0	4	4	0.615336	0.457584	42.18	40.37	86	47	19	35	80	93	49	20	45	9	4	-4	4	28	113	165
2			1		57	54.9288			0	2019-05-15	2020-07-31		0		2020-05-18	168	61		0	0	443						0	4	2	0.520541	0.391947	63.23	65.12	100	78	37	57	91	100	81	38	84	0	3	3	4	48	119	168
2			1		87	82.8904		20210329	2	2017-08-25	2020-07-31	01	1	2020-05-10 17:48:14	2020-07-24	175	63	20	0	1	1071		2				1	4	9	0.618062	0.5486	50.33	48.35	57	39	17	31	52	57	38	15	32	1	-3	-4	-8	3	91	146
2			1		68	66.6767			0	2020-05-29	2020-07-31		0		2020-07-29	162	80		1	0	63						0	4	6	0.60058	0.393807	73.76	79.17	67	63	40	50	68	67	67	53	53	-1	6	7	34	7	85	119
2			1		86	82.189			0	2017-09-14	2020-07-31		1	2019-11-14 19:31:51	2020-07-21	163	71		0	0	1051						0	6	8	0.654103	0.406696	70.35	70.24	95	91	52	69	100	100	96	53	91	5	5	0	1	31	98	113
2			1		64	61.5479			0	2018-11-22	2020-07-31		0		2020-07-02	166	66	30	0	0	617						0	4	3	0.574397	0.410218	68.48	68.01	89	77	37	76	104	90	77	35	72	1	0	-1	-7	-5	98	123
2			1		59	55.8274			0	2018-01-16	2020-07-31		3	2019-04-29 19:13:01	2019-07-02	170	72		0	0	927						0	1	6	0.519692	0.441577	68.1	67.82	81	69	36	67	91	79	67	32	75	-2	-3	0	-11	12	109	174
2			1		70	68.7205			0	2019-10-14	2020-07-31		3	2020-04-25 13:34:51	2020-07-30	150	73		0	0	291						0	0	7	0.674529	0.402333	73.52	74.66	76	71	38	54	89	72	69	35	57	-5	-3	2	-8	5	77	84
2			1		75	72.9452			0	2019-09-02	2020-07-31		0		2020-07-24	158	45		0	0	333						0	6	4	0.647702	0.511213	75.44	76.33	66	64	42	52	69	65	65	42	38	-1	0	1	-1	-26	75	94
2			1		76	74.9452	2021-03-12	20210312	2	2020-01-22	2020-07-31	16	1	2020-01-21 12:31:20	2020-07-02	165	67	NA	0	0	191		1		not checked		0	0	7	0.630657	0.539157	45.34		59	35	14	25	44										96	154
2			1		81	78.3945			0	2019-03-27	2020-07-31		0		2020-07-15	165	54		0	1	492						0	4	4	0.631512	0.483672	66.79	66.09	73	65	33	46	65	71	63	31	37	-2	-3	-1	-9	-20	90	122
2			1		67	65.463			0	2020-05-29	2020-07-31		0		2020-05-29	167	68		0	0	63						0	4	3	0.580372	0.386372	70.2	68.8	78	70	41	64	73	75	66	36	77	-4	-6	-2	-12	19	86	108
2			1		76	73.9342			0	2019-05-21	2020-07-31		2	2018-02-24 12:51:25	2020-07-09	166	58		0	0	437						0	4	7	0.607475	0.523701	52.86	48.48	65	45	15	48	55	71	45	16	47	10	1	-8	4	-3	107	171
2			1		82	79.1781			0	2018-05-25	2020-07-31		0		2020-07-03	177	74		0	0	798						0	4	4	0.585859	0.438362	73.02	66.92	63	62	45	52	55	61	54	36	74	-4	-12	-8	-20	42	75	102
2			1		57	54.874			0	2019-03-04	2020-07-31		1	2019-05-08 17:53:32	2020-07-29	172	60	37.5	0	0	515						0	4	8	0.543077	0.396933	53.76	52.87	89	60	29	47	93	90	60	27	41	1	0	-2	-7	-13	94	115
2			1		90	88.7452			0	2020-02-27	2020-07-31		0		2020-05-21	169	82		0	0	155						0	4	5	0.663572	0.467466	50.57	52.27	62	44	16	39	36	63	46	20	25	2	6	3	26	-37	86	120
2			1		70	66.4849			0	2018-01-08	2020-07-31		0		2020-06-18	172	95		0	0	935						0	6	6	0.555806	0.456248	53.48	52.33	58	40	18	25	57	61	41	16	32	5	3	-2	-10	27	104	189
2			1		56	53.5315			0	2018-10-31	2020-07-31		0		2020-04-14	176	75		0	0	639						0	4	3	0.501286	0.310937	72.31	76.81	90	81	54	70	76	89	86	64	74	0	6	6	19	5	83	83
2			1		73	70.8658			0	2019-08-29	2020-07-31		1	2018-02-24 14:55:27	2020-04-07	167	66	37.5	0	0	337						0	6	7	0.630689	0.531043	46.13	45.39	50	30	12	20	45	56	33	12	26	11	10	-2	1	26	72	112
2			1		84	82.4247			0	2020-01-07	2020-07-31		0		2020-06-23	160	76		0	0	206						0	4	5	0.673977	0.32922	70.56	72.02	90	86	45	66	94	93	90	52	58	3	5	2	16	-12	89	97
2			1		78	74.6877			0	2018-02-05	2020-07-31		0		2018-12-10	167	66		0	0	907						0	6	4	0.630227	0.430182	63.7	62.35	63	53	28	30	72	60	49	28	24	-5	-7	-2	1	-19	76	103
2			1		59	56.7945			0	2019-01-03	2020-07-31		1	2019-06-19 10:45:19	2020-07-23	173	81	40	0	0	575						0	4	3	0.499401	0.353258	66.16	67.73	97	81	46	58	77	99	84	49	51	1	4	2	8	-11	115	162
2			1		60	57.9836			0	2018-12-24	2020-07-31		28	2020-07-20 12:23:43	2020-07-20 12:23:43	163	60		0	0	585						0	4	5	0.562872	0.435486	71.24	68.16	85	75	40	72	92	87	74	33	71	2	-2	-4	-16	-2	101	137
2			1		69	67.0301			0	2019-01-16	2020-07-31		0		2020-06-15	167	59		1	0	562						0	4	3	0.593281	0.442378	63.73	63.49	73	60	27	64	78	77	62	26	71	5	4	0	-1	10	89	122
2			1		56	53.3151			0	2019-01-29	2020-07-31		0		2020-06-29	176	63		0	0	549						0	4	3	0.510171	0.42696	67.19	69.82	70	59	31	70	75	70	61	33	79	0	4	4	5	13	80	113
2			1		74	72.9534			0	2020-06-23	2020-07-31		3	2020-06-23 10:33:05	2020-07-02	146	45		0	0	38						3	6	5	0.688849	0.566346	51.96	62.44	69	46	17	24	68	64	51	20	27	-8	11	20	22	14	119	175
2			1		78	75.7726			0	2019-07-05	2020-07-31		0		2020-05-22	154	56		0	0	392						0	0	4	0.675872	0.431334	69.59		86	79	40	68	89										89	101
2			1		76	74.0082			0	2018-12-31	2020-07-31		1	2018-12-31 11:09:37	2019-10-01	161	73	40	0	0	578						1	4	5	0.631469	0.485303	69.06	67.88	57	51	29	28	63	57	51	25	28	1	-1	-2	-16	1	88	136
2			1		72	70.3041	2021-02-26	20210226	2	2020-01-07	2020-07-31	01	6	2020-05-10 12:21:06	2020-07-14	173	68		0	1	206		2				2	4	10	0.605041	0.425722	46.45	45.51	80	48	19	53	73	84	50	20	43	6	4	-2	4	-18	82	97
2			1		75	72.9233		20191006	1	2019-01-16	2019-10-06	05	3	2019-01-15 13:33:25	2019-08-12	161	44		0	0	263		2				4	6	5	0.632268	0.561817	55.01	58.8	56	40	18	33	49	56	43	21	25	0	7	7	17	-23	95	154
2			1		69	67.5863			0	2019-07-17	2020-07-31		0		2020-07-29	168	81		0	0	380						0	4	6	0.587073	0.369549	74.47	75.64	81	78	54	68	95	79	77	55	74	-3	-2	2	2	9	87	106
2			1		80	77.5288			0	2019-06-03	2020-07-31		0		2019-07-26	165	67	NA	0	0	424						0	2	4	0.628392	0.500166	52.87		55	39	17	25	48										100	165
2			1		79	78.3151			0	2020-05-21	2020-07-31		0		2020-07-09	158	46		0	1	71						0	0	7	0.650748	0.525546	49.08	45.57	74	48	16	51	80	74	45	15	52	1	-6	-7	-6	4	130	204
[truncated: 5 more columns]
